# Supplementary material for: Long-term change in the contributions of various source regions to surface ozone over Japan
Source: Copernicus journal article supplement (doi:10.5194/acp-2016-1087), 2017-01-19
Supplement: Supplementary file [file acp-2016-1087-AC2-supplement.pdf]

# 1 Long-term change in the ~~contributions of various source~~ 2 regions contribution to surface ozone over Japan

3  
4 **Tatsuya Nagashima<sup>1</sup>, Kengo Sudo<sup>2,3</sup>, Hajime Akimoto<sup>1</sup>, Junichi Kurokawa<sup>4</sup>, and**  
5 **Toshimasa Ohara<sup>1</sup>**

6 <sup>1</sup>National Institute for Environmental Studies, Tsukuba, Japan

7 <sup>2</sup>Graduate School of Environmental Studies, Nagoya University, Nagoya, Japan

8 <sup>3</sup>Frontier Research Center for Global Change, Yokohama, Japan

9 <sup>4</sup>Asia Center for Air Pollution Research, Niigata, Japan

10 *Correspondence to:* T. Nagashima (nagashima.tatsuya@nies.go.jp)

## 11 12 **Abstract**

13 The relative contributions of various source regions to the long-term (1980–2005) increasing  
14 trend in surface ozone (O<sub>3</sub>) over Japan were estimated by a series of tracer-tagging  
15 simulations using a global chemical transport model. The model well simulated the observed  
16 increasing trend of surface O<sub>3</sub> including its seasonal variation and geographical features in  
17 Japan and demonstrated the relative roles of different source regions in forming this trend.  
18 Most of the simulated increasing trend of surface O<sub>3</sub> over Japan (~97 %) was explained as the  
19 sum of trends in contributions of different regions to photochemical O<sub>3</sub> production. The  
20 increasing trend in O<sub>3</sub> produced in China accounted for 36 % of the total increasing trend and  
21 those in the other northeast Asian regions (the Korean Peninsula, coastal regions in East Asia,  
22 and Japan) each accounted for about 12–15 %. Furthermore, the contributions of O<sub>3</sub> created in  
23 the entire free troposphere and in West, South, and Southeast Asian regions also increased;  
24 and their increasing trends accounted for 16 and 7 % of the total trend, respectively. The  
25 impact of interannual variations in climate, in methane concentration, and in emission of O<sub>3</sub>  
26 precursors from different source regions on the relative contributions of O<sub>3</sub> created in each  
27 region estimated above was also investigated. The variation of climate and the increase in  
28 methane concentration together caused the increase of photochemical O<sub>3</sub> production in several  
29 regions, and represented about 19 % of the total increasing trend of surface O<sub>3</sub> over Japan.  
30 The increase in emission of O<sub>3</sub> precursors in China caused an increase of photochemical O<sub>3</sub>  
31 production not only in China itself but also in the other northeast Asian regions and accounted  
32 for about 46 % of the total increase in surface O<sub>3</sub> over Japan. Similarly, the relative impact of  
33 O<sub>3</sub> precursor emission changes in the Korean Peninsula and Japan were estimated as about 16  
34 and 4 % of the total increasing trend, respectively. The O<sub>3</sub> precursor emission change in  
35 regions other than northeast Asia caused increases in surface O<sub>3</sub> over Japan mainly through  
36 increasing photochemical O<sub>3</sub> production in West, South, and Southeast Asia and the free  
37 troposphere, and accounted for about 16 % of the total.

## 38 1 Introduction

39 Tropospheric ozone ( $O_3$ ) ~~plays multiple roles in the atmosphere.  $O_3$  itself~~ is an oxidant and  
40 photodissociates to generate the hydroxyl radical which strongly oxidizes many atmospheric  
41 compounds including various air pollutants and thus removes them from the atmosphere. In  
42 contrast, high levels of  $O_3$  are a major air pollutant due to adverse effects on human health,  
43 natural vegetation, and agricultural produce (Wang and Mauzerall, 2004; Mauzerall et al.,  
44 2005; US EPA, 2006; Silva et al., 2013). Moreover, tropospheric  $O_3$  is a major greenhouse  
45 gas in the atmosphere, and reduction of its amount was recently recognized as an effective  
46 measure to mitigate near-term climate change (UNEP and WMO, 2011; Shindell et al., 2012).  
47 Therefore, the spatial and temporal variations in tropospheric  $O_3$  have been always a matter of  
48 scientific and public concern.

49 ~~An increasing trend in tropospheric  $O_3$  concentration has been observed during recent~~  
50 ~~decades at many locations in East Asia including Taiwan (Chou et al., 2006; Chang and Lee;~~  
51 ~~2007; Li et al., 2010; Lin et al., 2010), mainland China (Lu and Wang, 2006; Ding et al.,~~  
52 ~~2008; Xu et al., 2008; Wang et al., 2009; Zhang et al., 2014), and South Korea (Susaya et al.,~~  
53 ~~2013; Lee et al., 2014; Seo et al., 2014). The increase rates of  $O_3$  in those East Asian regions~~  
54 ~~significantly vary depending on location and season in the range of about 0.3–3 ppbv/yr;~~  
55 ~~however, the increases are generally larger than the trends in tropospheric  $O_3$  for other regions~~  
56 ~~in the world (Cooper et al., 2014). Japan is no exception experienced a rapid industrialization~~  
57 ~~ahead of other Asian countries, with and an increasing trend has been found in various~~  
58 observations of  $O_3$  over the past approximately 40 years. Routine ozonesonde measurements  
59 since 1970 at three Japanese sites of Sapporo (43° N), Tsukuba (36° N), and Kagoshima (32°  
60 N) showed an increasing trend of  $O_3$  concentration in the lowermost troposphere up to about  
61 1990 and relatively stable thereafter, with largest increase near the ground and discernible  
62 about 300 hPa height and below (Logan et al., 1999; Oltmans et al., 2006). With an air mass  
63 classification method based on backward air trajectories, Naja and Akimoto (2004) showed  
64 that a significant amount of the air masses reaching these ozonesonde sites in Japan spend  
65 substantial time over polluted regions in East Asia. The  $O_3$  levels in these regionally polluted  
66 air masses increased from the 1970s to the 1990s, mainly due to large increases in nitrogen  
67 oxide ( $NO_x = NO + NO_2$ ) emissions over China in the 1990s. Oltmans et al. (2013) analyzed a  
68 rather short period of data (1991–2010) obtained at the Ryori (39° N) surface site in north-  
69 eastern Japan and showed an increase into the mid-1990s followed by relatively little change.  
70 Other ground-based observations at a mountain site (Mt. Happo; 43° N, 1850 m asl) and three  
71 sites in the marine boundary layer along the west coast of Japan [Rishiri (45° N), Tappi (41°  
72 N), and Sado (38° N)], where few sources of pollutants exist nearby, obtained under the  
73 monitoring network of EANET (the Acid Deposition Monitoring Network in East Asia) also  
74 showed increasing trends of  $O_3$  concentrations at least until the mid-2000s (Tanimoto, 2009;  
75 Tanimoto et al., 2009; Parrish et al., 2012). During the recent decades, an increasing trend in  
76 tropospheric  $O_3$  has also been observed at many locations in East Asia including Taiwan  
77 (Chou et al., 2006; Chang and Lee; 2007; Li et al., 2010; Lin et al., 2010), mainland China  
78 (Lu and Wang, 2006; Ding et al., 2008; Xu et al., 2008; Wang et al., 2009; Zhang et al., 2014),  
79 and South Korea (Susaya et al., 2013; Lee et al., 2014; Seo et al., 2014). The increase rates of  
80  $O_3$  in those East Asian regions significantly vary depending on location and season in the  
81 range of about 0.3–3 ppbv/yr; however, the increases are generally larger than the trends in  
82 tropospheric  $O_3$  for other regions in the world (Cooper et al., 2014).

83 In addition Japan, analysis of long-term observations by the ambient air quality monitoring  
84 network mainly established in urban–suburban regions ~~in Japan~~ also showed continuous  
85 increases of surface  $O_3$  from the mid-1980s until the present (Ohara and Sakata, 2003; Ohara

86 et al., 2008; Kurokawa et al., 2009; MOE Japan, 2013; Wakamatsu et al., 2013; Akimoto et  
87 al., 2015). And the consequent high violation rate of national ambient air quality standard  
88 (AAQS) for surface O<sub>3</sub> (hourly mean concentration of 60 ppbv) has been the persistent issue  
89 in environmental administration for a long time, therefore, there is an urgent need to study the  
90 reason for the increasing trend and examine the countermeasures. However, One clue is that  
91 the simultaneous observations of O<sub>3</sub> precursors such as NO<sub>x</sub> and non-methane hydrocarbons  
92 (NMHCs) by this monitoring network revealed their decreasing trends in the same period  
93 (MOE Japan, 2013), which seemed inconsistent with the increasing trend of O<sub>3</sub> over Japan.  
94 These observed features of O<sub>3</sub>-related atmospheric species in Japan suggest that there should  
95 be an influence of transboundary transport from outside of Japan on the recent increasing  
96 trend in O<sub>3</sub>. The influence of transboundary transport on surface O<sub>3</sub> in East Asia was  
97 examined in several studies (Sudo and Akimoto, 2007; Li et al., 2008; Nagashima et al., 2010;  
98 Wang et al., 2011). Nagashima et al. (2010) demonstrated that the O<sub>3</sub> transported from outside  
99 of Japan accounted for more than 70 % of surface O<sub>3</sub> over Japan in the cold season (October–  
100 March) during 2000–2005, and most was attributable to O<sub>3</sub> from distant sources outside East  
101 Asia and from the stratosphere. In the warm season (April–September), the contribution of  
102 domestically created O<sub>3</sub> in Japan to surface O<sub>3</sub> over Japan increased significantly (about 20–  
103 40 %), the short range intra-regional transport of O<sub>3</sub> from other parts of East Asia still  
104 contributed about 25 %, and long range inter-regional transport of O<sub>3</sub> from outside East Asia  
105 and the stratosphere particularly in spring could account for about half of surface O<sub>3</sub> over  
106 Japan.

107 Therefore, the influence of O<sub>3</sub> from source regions outside and inside East Asia and the  
108 stratosphere should be considered to explain the cause of the increasing trend in surface O<sub>3</sub>  
109 over Japan. The rapid increase in O<sub>3</sub> precursor emissions in East Asia in recent decades  
110 (Ohara et al., 2007; Kurokawa et al., 2013) was demonstrated as a major cause of the  
111 increasing trend of springtime O<sub>3</sub> over Japan by comparing regional chemical transport model  
112 (CTM) simulations of recent decades with and without the East Asian O<sub>3</sub> precursor emission  
113 increases during the period (Kurokawa et al., 2009; Tanimoto et al., 2009). However, they  
114 only showed the springtime O<sub>3</sub> case and it was unclear whether the relationship held in other  
115 seasons. Moreover, the relative contributions of individual countries or regions in East Asia  
116 have not been well examined, particularly concerning increased surface O<sub>3</sub> over Japan.

117 Here, we investigated the cause of the continuous increase in surface O<sub>3</sub> over Japan reported  
118 in the above literature, focusing on the relative contributions of various source regions over  
119 the globe, particularly the contributions of individual regions in East Asia, with a long-term  
120 simulation of a global CTM using the tagged tracer method. Using the same model and  
121 method, Nagashima et al. (2010) showed such relative contributions of regions inside and  
122 outside East Asia on surface O<sub>3</sub> over Japan as average values for the early 2000s. The current  
123 study investigated the temporal evolution of the relative contributions of each region for the  
124 26 years of 1980–2005.

125

## 126 **2 Methods**

### 127 **2.1 Model description**

128 In this study, we employed a chemistry climate model (CCM), CHASER (Sudo et al., 2002),  
129 developed for the atmospheric chemistry research in the troposphere. The basic setting of the  
130 model was almost identical to that used by Nagashima et al. (2010). However, the horizontal  
131 resolution was modified from T63 (about 1.9° by 1.9° grid spacing in longitude and latitude)

132 to T42 (about 2.8° by 2.8°), because longer simulation period was necessary than in the  
133 previous study, and so the cost of computation was reduced in the present study by selecting  
134 lower horizontal resolution. There were 32 vertical layers with the top layer set at  
135 approximately 40 km altitude. A detailed tropospheric photochemistry consisted of 113  
136 chemical reactions and 27 photodissociation involving O<sub>3</sub>, HO<sub>x</sub>, NO<sub>x</sub>, methane (CH<sub>4</sub>), CO and  
137 NMHCs calculated the temporal evolution in the concentrations of 53 chemical species. ~~The  
138 gas and liquid phase oxidation of sulfur dioxide (SO<sub>2</sub>) and dimethyl sulfide to form the sulfate  
139 aerosol was also included in the model.~~ The concentrations of O<sub>3</sub> and some nitrogen  
140 compounds (NO<sub>x</sub>, HNO<sub>3</sub>, and N<sub>2</sub>O<sub>5</sub>) above the tropopause that should affect tropospheric  
141 chemistry were assimilated into the monthly mean output data of stratospheric CCM, because  
142 the version of CHASER used was unable to calculate several chemical processes, such as  
143 halogen-related chemical reactions, which are indispensable for realistic representation of  
144 such chemical compounds in the stratosphere. ~~For the transport of chemical species, a semi-  
145 Lagrangian advective transport scheme (Lin and Rood, 1996; van Leer, 1997) and vertical  
146 convective transport associated with cumulus convection process were considered.~~ The model  
147 also included dry and wet deposition of chemical species.

148 In this study, we conducted tracer-tagging simulation by using two different setups (full-  
149 chemistry and tracer-transport setups) of CHASER. The full-chemistry setup calculated the  
150 actual temporal change in the concentration of chemical species through the abovementioned  
151 chemical and physical processes and outputted the chemical production and loss tendencies of  
152 O<sub>3</sub> and related species. Then, the tracer-transport setup used the outputted chemical  
153 tendencies to calculate the temporal change in the concentration of hypothetical O<sub>3</sub> tracers. In  
154 the following subsection, the calculation procedure is briefly described.

155

## 156 **2.2 Outline of the numerical simulations**

### 157 **2.2.1 Forcings for long-term simulation**

158 Long-term simulation was performed for the period 1980–2005. The end of simulation  
159 period (2005) was determined mainly due to the temporal coverage of the Asian emission data  
160 described below, however, this period sufficiently covered the years reported to have  
161 increasing trend in surface O<sub>3</sub> over Japan in the previous literatures. To drive the physical  
162 properties of the model for this 26-year period, the temperature and horizontal wind velocities  
163 in the model were assimilated into the National Center for Environmental Prediction/National  
164 Center of Atmospheric Research (NCEP/NCAR) 6-hour reanalysis data (Kalnay et al., 1996)  
165 of the corresponding year, and sea surface temperature and sea ice data of the Hadley Centre's  
166 Sea Ice and Sea Surface Temperature (HadISST) data set (Rayner et al., 2003) were used in  
167 the model.

168 The monthly mean stratospheric O<sub>3</sub> data of Akiyoshi et al. (2009) was used for the  
169 assimilation above the tropopause for this period. These data were the output of a  
170 stratospheric CCM simulation according to the hindcasting scenario for 1980–2004 (REF1  
171 scenario) of the CCM validation activity (CCMVal) (Eyring et al., 2005), and included an  
172 interannual variation (IAV) associated with the 11-year solar cycle and large declines after  
173 1982 and 1991 due to the El Chichon and Pinatubo eruptions, respectively, in addition to a  
174 continuous decreasing trend during the whole period. Although the simulated declines of  
175 stratospheric O<sub>3</sub> due to the two large volcanic eruptions were somewhat overestimated, the  
176 simulated IAVs in stratospheric O<sub>3</sub> reasonably well represented those observed with a total

177 ozone mapping spectrometer (TOMS) from satellites (Akiyoshi et al., 2009). Incidentally, the  
178 stratospheric O<sub>3</sub> data of 2004 were used for 2005.

179 The long-term variation of the emissions of O<sub>3</sub> precursors (NO<sub>x</sub>, CO, and NMHCs) ~~and SO<sub>2</sub>~~  
180 were taken from multiple emission inventories. For anthropogenic emissions in Asia, the  
181 Regional Emission inventory in ASia (REAS ver.1.2) (Ohara et al., 2007) was used for each  
182 year in the whole simulation period (1980–2005); ~~the REAS emission data were available for~~  
183 ~~each year in the period.~~ Kurokawa et al. (2009) used these emission data with a regional air  
184 quality model representing well the interannual variability of surface O<sub>3</sub> over Japan for  
185 similar period (1981–2005) to the present study. For anthropogenic emissions outside Asia, a  
186 combination of three versions of EDGAR (Emission Database for Global Atmospheric  
187 Research) emission data was used: EDGAR-HYDE (Van Aardenne et al., 2001) for 1980 and  
188 1990; EDGAR v3.2 (Olivier and Berdowski, 2001) for 1990 and 1995; and EDGAR v3.2 Fast  
189 Track 2000 (FT2000) (Olivier and Berdowski, 2001) for 2000. Because several emission  
190 sectors considered in EDGAR v3.2 were not considered in EDGAR-HYDE, the emissions for  
191 1990 in EDGAR-HYDE were generally smaller than in EDGAR v3.2. Therefore, we used  
192 EDGAR v3.2 data for 1990, and also scaled them to estimate emission data for 1980 rather  
193 than simply using EDGAR-HYDE data for 1980. For that, we scaled EDGAR v3.2 data for  
194 1990 so that the ratio ( $r$ ) of the difference between 1980 ( $f_1$ ) and 1990 data ( $f_2$ ) and their  
195 average in EDGAR-HYDE [i.e.,  $r = (f_2 - f_1)/(f_1 + f_2)/2$ ] equaled the corresponding ratio ( $R$ )  
196 calculated from 1990 data in EDGAR v3.2 ( $F_2$ ) and 1980 data scaled from it ( $F_1$ ) [i.e.,  $R = (F_2$   
197  $- F_1)/(F_1 + F_2)/2$ ]. We calculated  $F_1$  from the known values of  $f_1$ ,  $f_2$ , and  $F_2$  using the equation  
198  $r = R$ . Since EDGAR emission data were not available for each year but for every 10 or 5  
199 years in the simulation period, the emissions for intermediate years were interpolated, and  
200 FT2000 data used for years after 2000. The vegetation fire emission data developed in the  
201 REanalysis of the TROpospheric chemical composition over the past 40 years project  
202 (RETRO) (Schultz et al., 2008) were used for O<sub>3</sub> precursor emissions from biomass burning  
203 ~~for the whole land area. RETRO data were available~~ for each year until 2000 in the simulation  
204 period, and data for 2000 were used for years after 2000. Historical transition of the  
205 atmospheric concentrations of carbon dioxide, nitrous oxide (~~N<sub>2</sub>O~~), and CH<sub>4</sub> were prescribed  
206 with those used in Nozawa et al. (2005), which were somewhat old estimations of the  
207 historical evolution in greenhouse gas concentrations, but not much different from recent  
208 estimations such as for the Representative Concentration Pathways (RCPs) (Meinshausen et  
209 al., 2011). The difference in the concentrations between both estimations were generally  
210 within a couple of percent in the simulation period.

211 The linear trends of NO<sub>x</sub> and NMVOC annual emissions used in this study in the simulation  
212 period of 1980–2005 are shown in Fig. 1. The long-term trends of emissions of both species  
213 showed generally similar geographical features to each other; large decrease trends in central  
214 Europe, Scandinavia, western Russia, and Kazakhstan, whereas there were widely spread  
215 increasing emissions in West, South, Southeast, and East Asia, almost all Africa and Central  
216 and South America except for inland Brazil. In North America, NO<sub>x</sub> emission generally  
217 decreased in the simulation period except for the west coast and New England area of the  
218 USA, but that of NMVOC mostly increased with a few patchy exceptions. The trends of NO<sub>x</sub>  
219 and NMVOC emissions mentioned above were mainly due to the change in anthropogenic  
220 emissions, while the change in biomass burning emissions led to a discernible trend in several  
221 regions such as inland Brazil and the south of Sahel.

222 The long-term evolution of annual emissions of NO<sub>x</sub> and NMVOC over several source areas  
223 in the Northern Hemisphere is shown in Fig. 2. Because the emission data were the  
224 combination of three different datasets outside Asia, there were somewhat discontinuous



225 changes at the joint years (1990 and 1995) in European and North American emissions. The  
226 emissions of NO<sub>x</sub> and NMVOC over Europe had peaks around 1990 and generally decreased  
227 afterward. Over North America, both species showed small long-term trends: slight decreases  
228 in NO<sub>x</sub> and slight increases in NMVOC emissions. The emissions of both species over China  
229 greatly increased during the whole period. The NO<sub>x</sub> emissions were about 4.0 times larger in  
230 2005 than 1980 and correspondingly NMVOC was 2.5 times larger, which made emissions of  
231 both species for China equal to or even surpassing those for Europe or North America in 2005.  
232 The emissions of both species over the Korean Peninsula increased approximately 2.8 times  
233 during this period. However, those over Japan showed no such increase: NO<sub>x</sub> emission  
234 decreased until 1995 and thereafter remained stable, whereas NMVOC emissions went up  
235 until 1995 and then slightly decreased.

### 236 **2.2.2 Tracer tagging**

237 We conducted a 26-year simulation using the full-chemistry setup of CHASER with all the  
238 forcings mentioned above, followed by another 26-year simulation with the tracer-transport  
239 setup of CHASER which calculated the concentration of hypothetical O<sub>3</sub> tracers, each tagged  
240 with a particular region in the model domain. The procedure to tag a tracer with each region  
241 in the second simulation was the same as used by Nagashima et al. (2010) and a brief  
242 description follows. In the second simulation, the transport and dry deposition of each O<sub>3</sub>  
243 tracer were calculated same as in the first simulation, however the chemical development of  
244 tracers was calculated using the chemical production (P) and loss frequencies (L) of the  
245 extended odd oxygen family [O<sub>x</sub> = O<sub>3</sub> + O + O(<sup>1</sup>D) + NO<sub>2</sub> + 2NO<sub>3</sub> + 3N<sub>2</sub>O<sub>5</sub> + PANs + HNO<sub>3</sub>  
246 + other nitrates] calculated and archived in the first simulation. In the first simulation, 3D  
247 fields of P and L were outputted every 6 hours. Each O<sub>3</sub> tracer could be lost chemically  
248 everywhere in the model domain at the frequency of L, but could be chemically produced  
249 only inside its tagged region. In the stratosphere ~~over the tropopause defined by the lapse rate,~~  
250 the concentration of O<sub>3</sub> tracer tagged with the stratosphere was assimilated into the same  
251 stratospheric O<sub>3</sub> data as used in the first simulation, but the concentration of the tracers tagged  
252 with the region in the troposphere were all set to zero. The calculated concentration of each  
253 tagged O<sub>3</sub> tracer at a given location represents the contribution of O<sub>3</sub> produced in each source  
254 region and transported to that location.

255 ~~The horizontal and vertical separation of the model domain for the tracer tagging was also~~  
256 ~~the same as used by Nagashima et al. (2010).~~ The troposphere in the model domain was  
257 horizontally separated into 22 regions and each horizontal region was further separated  
258 vertically between the free troposphere (FT) and the planetary boundary layer (PBL). The  
259 stratosphere was considered one separate source region, that is, the model domain was  
260 separated into 45 source regions. The 22 regions for horizontal separation are shown in Fig. 1  
261 and each region was assigned a three-letter code (e.g., AMN for North America) which is  
262 used in the following sections. For the vertical separation of the source regions in the  
263 troposphere, the PBL was defined as the lowest six layers in the model (surface to about 750  
264 hPa), based on the observed and modeled vertical profiles of O<sub>3</sub> production.

265 The long-term tracer-tagging simulation allowed estimation of the long-term variations in  
266 contributions of each source region to the O<sub>3</sub> concentration at given receptor locations. This is  
267 important information to explain the cause of the reported increasing trend in surface O<sub>3</sub> over  
268 East Asia. However, it should be noted that the tracer-tagging simulation calculates the  
269 amount of O<sub>3</sub> in a receptor location that was produced chemically in each source region from  
270 O<sub>3</sub> precursors emitted both from the source region and adjacent source regions. Thus, the  
271 contribution of a source region estimated in tracer-tagging simulation should not be fully

272 attributed to emissions of O<sub>3</sub> precursors in that source region. Emission sensitivity simulation  
273 is another method of estimating the portion of O<sub>3</sub> fully attributable to a change in O<sub>3</sub> precursor  
274 emissions in a source region, and takes the difference of simulated O<sub>3</sub> between two model  
275 runs with and without perturbed O<sub>3</sub> precursor emissions in that source region. The resulting  
276 estimations of source contributions by the two methods can differ; however, the differences  
277 have not yet been well quantified. Li et al. (2008) reported that the difference between the two  
278 methods could be as much as 30 % in source apportionment estimation for one location and  
279 time (i.e., Mt. Tai in central eastern China in June 2006). Wang et al. (2011) found somewhat  
280 larger differences in the contributions of China to domestic O<sub>3</sub> concentration between the two  
281 methods for each month of the year, but no discussions were made for O<sub>3</sub> over Japan.

282 Nevertheless, we employed the tracer-tagging simulation to study the cause of reported long-  
283 term change in surface O<sub>3</sub> over Japan mainly due to its computational efficiency. Thus, the  
284 results should be carefully interpreted in terms of the difference between the source regions of  
285 chemical O<sub>3</sub> production and those of O<sub>3</sub> precursor emissions. The computational efficiency  
286 resulting from the tracer-tagging approach and relatively coarse horizontal resolution enabled  
287 us to make several sensitivity simulations with the different combination of forcings for long-  
288 term simulation. In the following sections, the simulation with the full set of long-term  
289 forcings described above, hereinafter referred to as “standard” simulation, is initially analyzed.  
290 This is then further interpreted using the results of sensitivity simulations; the specific settings  
291 of sensitivity simulations are also described.

292

### 293 **3 Results and discussion**

#### 294 **3.1 Long-term evolution of surface O<sub>3</sub> over Japan**

295 Nagashima et al. (2010) validated how well CHASER can reproduce the observed features  
296 of surface O<sub>3</sub> concentrations by comparing the simulated surface O<sub>3</sub> concentrations with  
297 observations taken during 2000–2005 at several sites mainly in rural areas in the Northern  
298 Hemisphere, and CHASER successfully simulated the annual variation of surface O<sub>3</sub> in a  
299 variety of regions. In this study, the horizontal resolution of the model differed from that used  
300 in Nagashima et al. (2010); however, the model well represented the observed concentrations  
301 and seasonal evolutions of surface O<sub>3</sub> (Fig. S1 and Table S1 in the Supplement). The surface  
302 O<sub>3</sub> over Japan has been observed at ambient air quality monitoring stations since the early  
303 1970s ~~when severe air pollution occurred in industrial or urban areas~~. The monitoring data  
304 have been compiled by the Atmospheric Environmental Regional Observation System  
305 (AEROS). ~~The number of stations increased since the launch of the system and, for the period~~  
306 ~~of simulation (1980–2005), a~~ about 1000 monitoring stations widely distributed throughout  
307 Japan except in the southern islands could be used for validation of the model results. The  
308 monitoring data of AEROS have been used to examine the long-term variation of surface O<sub>3</sub>  
309 over Japan in several studies and showed significant increasing trends (Ohara and Sakata,  
310 2003; Ohara et al., 2008; Kurokawa et al., 2009; Akimoto et al., 2015). We validated the  
311 simulated surface O<sub>3</sub> over Japan with the AEROS data in terms of the long-term variation in  
312 the following.

313 For the validation, the monitoring sites selected had continuously observed the surface O<sub>3</sub>  
314 during the simulation period (1980–2005). To ensure continuity of sites, we selected  
315 monitoring sites with annual mean surface O<sub>3</sub> available for every year in the simulation period.  
316 The annual mean data at a monitoring site was calculated as the average of monthly means  
317 when available for more than 9 months, the monthly mean was calculated from daily means

318 when available for over 19 days per month, and the daily mean was calculated from hourly  
319 means when available for more than 19 hours per day. There were 339 sites, located mainly in  
320 populated areas of Japan except in the northernmost island (Hokkaido) and southern islands  
321 (Nansei Islands). We first calculated the annual mean surface O<sub>3</sub> ~~from the observed hourly~~  
322 ~~data at each monitoring site as described above~~, and then the annual means of all sites were  
323 averaged to calculate the observed annual mean surface O<sub>3</sub> over Japan. The simulated annual  
324 mean surface O<sub>3</sub> over Japan was calculated as the average of annual means of the model grids,  
325 which included the locations of monitoring sites selected for the validation. ~~Therefore, the~~  
326 ~~model grids including Hokkaido or Nansei Islands were not used to calculate the simulated~~  
327 ~~annual mean.~~ The temporal variations of observed and simulated annual mean surface O<sub>3</sub>  
328 anomalies during 1980–2005 averaged over Japan are shown in Fig. 3. During the period, the  
329 observed annual mean surface O<sub>3</sub> over Japan showed a clear increasing trend with a linear  
330 increase of about 2.70 ppbv/decade, which was significant at the 5 % risk level. The simulated  
331 annual mean surface O<sub>3</sub> over Japan also showed a significant increasing trend with a rate of  
332 about 2.58 ppbv/decade, which corresponded well to the observed increase in surface O<sub>3</sub> over  
333 Japan. The value of the linear increasing trend and the observed features of IAVs-long-term  
334 variation in surface O<sub>3</sub> over Japan – such as a rapid increase from the mid-1980s to the mid-  
335 1990s followed by a stagnation of increase for about 7–8 years and a further increase in the  
336 past several years – were reasonably well captured by the model.

337 The model also well represented the longitudinal differences in the long-term trend of  
338 surface O<sub>3</sub> in Japan. Figure 4 shows the maps of linear trends of annual mean surface O<sub>3</sub>  
339 during 1980–2005 calculated from the model simulations and observations at AEROS  
340 monitoring sites as selected for Fig. 3. The simulated annual mean surface O<sub>3</sub> showed an  
341 increasing trend in the whole area including all of Japan and the Korean Peninsula (Fig. 4a).  
342 The simulated increasing trend of annual mean surface O<sub>3</sub> well exceeded 2.0 ppbv/decade in  
343 wide areas of Japan except for Hokkaido, and tended to be greater toward western Japan,  
344 which is nearer to the Asian continent. However, the increasing trends of observed annual  
345 mean surface O<sub>3</sub> at each monitoring site (Fig. 4b) differed greatly from each other even in  
346 nearby sites, and there was no apparent longitudinal tendency in trends at individual  
347 monitoring sites. However, we averaged the observed annual mean surface O<sub>3</sub> at individual  
348 monitoring sites at longitudinal intervals (approximately 2.8°) of the model grids as shown by  
349 gray rectangles (Fig. 4b) and calculated the long-term trend of averaged monitoring data at  
350 each longitudinal band. The calculated increasing trends were clearly larger toward the west,  
351 which was consistent with westward rise of the increasing trends of simulated data.

352 There were seasonal differences in the long-term increasing trend of surface O<sub>3</sub> over Japan.  
353 The temporal variations of observed and simulated seasonal mean surface O<sub>3</sub> anomalies  
354 during 1980–2005 averaged over Japan are shown in Fig. 5. The increasing trend of surface  
355 O<sub>3</sub> over Japan in the monitoring data was greatest in spring (March–May: 4.04 ppbv/year) and  
356 was also large in summer (June–August: 3.07 ppbv/year); in contrast, increasing trends were  
357 relatively small in fall (September–November: 2.29 ppbv/year) and winter (December–  
358 February: 1.28 ppbv/year). Seasonal dependency in the increasing trends of observed surface  
359 O<sub>3</sub> over Japan has been previously reported (Ohara and Sakata, 2003; ~~Naja and Akimoto,~~  
360 ~~2004~~; Parrish et al., 2012). Ohara and Sakata (2003) examined almost the same O<sub>3</sub> monitoring  
361 data in Japan as used in the present study for the period 1985–1999 and showed year-round  
362 increase in surface O<sub>3</sub> from 1985–1987 to 1997–1999 with a greater increase in the warm  
363 season (March–August) than in the rest of the year. ~~Naja and Akimoto (2004) also reported a~~  
364 ~~larger increase of O<sub>3</sub> in the warm season between the period 1970–1985 and 1986–2002 in the~~  
365 ~~boundary layer over Japan by analyzing ozonesonde data at four sites.~~ Parrish et al. (2012)



366 summarized long-term changes in lower tropospheric baseline O<sub>3</sub> over the world including  
367 two regions in Japan (Mt. Happo and several sites in the marine boundary layer grouped as  
368 one region), and showed that the increasing trend of surface O<sub>3</sub> was greatest in spring and  
369 least in fall in these two regions. In the present study, the simulated increasing trend in  
370 seasonal mean surface O<sub>3</sub> was also larger in the warm (spring–summer) than in the cold  
371 season (fall–winter), consistent with the observed increasing trends.

372 As described above, our model captured well the basic features of long-term trends in  
373 observed surface O<sub>3</sub> over Japan, which allowed us to use the simulated data for further  
374 analysis on the source of the long-term trend in the next section.

375

### 376 **3.2 Contributions of O<sub>3</sub> production regions**

377 The tracer-tagging simulation for 1980–2005 was conducted ~~to examine the long-term~~  
378 ~~variations of O<sub>3</sub> tracers tagged by regions of photochemical production, and the~~ IAVs in the  
379 annual mean concentrations of each tagged O<sub>3</sub> tracer averaged over Japan are shown in Fig. 6.  
380 The tagged tracers other than FT and stratosphere in Fig. 6 and the following figures represent  
381 the contribution of O<sub>3</sub> produced in the PBL of different source regions shown in Fig. 1, where  
382 contributions of several source regions were grouped into some combined source regions. It  
383 should be noted that the model grids used for averaging in these figures differed from those in  
384 Figs. 3–5. They encompassed almost all of Japan excluding the Nansei Islands in order to  
385 examine temporal behavior of tagged O<sub>3</sub> tracers in all of Japan (see Fig. 4 for actual areas for  
386 averaging).

387 Domestically created O<sub>3</sub> was the largest contribution to surface O<sub>3</sub> concentration averaged  
388 over Japan during the whole simulation period. The contribution of domestic production had a  
389 large IAV and was larger in the last decade (1996–2005) than previously.

390 The second largest contribution was the O<sub>3</sub> created in the FT as a whole during almost the  
391 entire period. For the FT, the northern mid-latitude regions such as North Pacific (NPC),  
392 Europe (EUR), North Atlantic (NAT), North America (AMN), and China (CHN) made  
393 leading contributions during the period; however, the increasing trend of these contributions  
394 was considerable particularly for CHN and NPC (Fig. S2). Despite such differences among  
395 the regional contributions in the FT, we hereafter only considered the total of each regional  
396 contribution in the FT, since it was difficult to associate a regional contribution with a  
397 particular source region of O<sub>3</sub> precursor emissions. The precursors eventually resulted in O<sub>3</sub>  
398 production in a region in the FT can be transported longer distance due to faster wind speed in  
399 the FT and therefore would be influenced by emissions from a wider range of source regions  
400 than in the PBL. The total FT contribution showed an increasing trend during the period.

401 The NO<sub>x</sub> emission from lightning was an indispensable source of NO<sub>x</sub> in the FT. The global  
402 annual lightning-NO<sub>x</sub> emission in the current simulation was about 3.1 TgN/year averaged  
403 over the entire period and showed a small but significant increase of about 0.012 TgN/year  
404 (0.39 %/year). The increase in lightning-NO<sub>x</sub> emission was a consequence of changes in  
405 convection activities due to the change in climate forced into the model during the period  
406 (~~NCEP/NCAR meteorology and HadISST data~~). However, this increase in lightning-NO<sub>x</sub>  
407 emission was not the main cause of the increase in the contribution of the total FT – because a  
408 sensitivity simulation with all emissions, CH<sub>4</sub> concentration, and stratospheric O<sub>3</sub> fixed at the  
409 year 1980 level but with the same temporal evolution in climate showed a quite similar  
410 increase in lightning-NO<sub>x</sub> emission but no significant increasing trend in the total FT

411 contribution. Therefore, the main cause of the increasing trend in the total FT contribution  
412 was likely to be factors other than the increase in lightning-NO<sub>x</sub> emission.

413 The contribution of stratospheric O<sub>3</sub> was also large during the entire period, with  
414 considerable temporal fluctuations. The large decreases of stratospheric contribution in the  
415 early 1980s and 1990s stemmed from the decline of stratospheric O<sub>3</sub> concentration due to the  
416 impact of large volcanic eruptions of Mt. El Chichon in 1982 and Mt. Pinatubo in 1991,  
417 respectively (Akiyoshi et al., 2009).

418 In the early 1980s, the combined contributions of far remote regions from Japan in the  
419 northern mid-latitude (Remote: EUR, NAT, and AMN) made a significant contribution, the  
420 fourth largest, to the surface O<sub>3</sub> over Japan and remained at a steady level of contribution  
421 during the study period. At the same time, the contribution of CHN significantly increased  
422 from the mid-1980s, overtook the contribution of Remote in the early 1990s, and became the  
423 largest single regional contribution – excluding the domestic one (i.e., JPN). Moreover, the  
424 contributions of O<sub>3</sub> produced in the Korean Peninsula (KOR), the coastal regions in East Asia  
425 [E-Asia-Seas: NPC, East China Sea (ECS), and Japan Sea (JPS)], and West-South-SouthEast  
426 (WSSE) Asian regions [including Middle East (MES), India (IND), Indochina and Philippines  
427 (IDC), and Indonesia etc. (IDN)] also showed obvious increasing trends.

428 The linear trend (ppbv/decade) of annual mean tagged O<sub>3</sub> tracers during the simulation  
429 period as well as that of the total O<sub>3</sub>, which is the sum of all tagged O<sub>3</sub> tracers averaged over  
430 whole Japan (JPN-ALL) and those averaged over three sub-regions in Japan: western (JPN-  
431 W), eastern (JPN-E), and northern (JPN-N) Japan is shown in Fig. 7 (see Fig. 4 for the  
432 definition of sub-regions). The trend was calculated from the annual mean concentrations.  
433 The increasing trend of total O<sub>3</sub> averaged over JPN-ALL was 2.37 ppbv/decade, which was  
434 somewhat smaller than estimated in Fig. 3 (2.58 ppbv/decade) due to inclusion of model grids  
435 in JPN-N for averaging where the simulated increasing trend of O<sub>3</sub> was relatively small. The  
436 increasing trend of total O<sub>3</sub> tended to be greater westward. The absolute contribution of  
437 domestically produced O<sub>3</sub> in Japan differed among the regions – it tended to be larger in JPN-  
438 E than other parts of Japan (Nagashima et al., 2010); however, there were no such regional  
439 differences in long-term trends. The westward tendency of larger increasing trends in total O<sub>3</sub>  
440 over Japan was mainly due to the similar tendency in the trends of the contribution of CHN,  
441 KOR, and E-Asia-Seas, which strongly suggested a large impact of intra-regional  
442 transboundary air pollution in East Asia. In particular, the increasing trend in the CHN  
443 contribution was the largest for all sub-regions in Japan. The increasing trend in the  
444 contributions of total FT and WSSE Asia was slightly smaller for JPN-N than for other parts  
445 of Japan, which also contributed to the regional differences of the trend in total O<sub>3</sub> over Japan.  
446 ~~Interestingly, the contribution of Remote showed a small but significant increase only in JPN-~~  
447 ~~N—although emissions of O<sub>3</sub> precursors, NO<sub>x</sub> in particular, in Remote did not increase during~~  
448 ~~the period.~~ Due to the large interannual fluctuation, the linear long-term trend of the  
449 stratospheric contribution was non-significant for all regions in Japan.

450 The linear trend of tagged O<sub>3</sub> tracers and total O<sub>3</sub> averaged over all of Japan in spring,  
451 summer, fall, and winter is shown in Fig. 8. The increasing trends of total O<sub>3</sub> in decreasing  
452 order were spring, summer, winter, and fall. This is quite consistent with the seasonal  
453 differences in the increasing trend of O<sub>3</sub> observed at several Japanese sites from the 1990s to  
454 2011 (Parrish et al., 2012). The increasing trend in the CHN contribution was the largest of all  
455 contributions in all four seasons and the trend was particularly large in spring. The KOR  
456 contribution was also larger in spring than in other seasons, ~~with the trend in summer of low~~  
457 ~~statistical significance due to relatively large IAVs.~~ The contribution of E-Asia-Seas increased

458 significantly in all seasons. Seasonal differences in the increasing trend in the E-Asia-Seas  
459 contribution were small, but were slightly larger in the warm (spring–summer) than the cold  
460 season (fall–winter). The increasing trend in domestic (JPN) contribution was larger in spring  
461 than in summer similarly to the cases of CHN and KOR contributions, but trends in both  
462 seasons were non-significant; whereas those in the cold season were significantly larger than  
463 in the warm season. The FT and WSSE Asian contributions showed semi-annual change in  
464 their increasing trends; larger in summer and winter than in spring and fall. The contribution  
465 of Remote showed a significant increasing trend only in winter; ~~conversely that of Central-~~  
466 ~~North (CN) Asian regions [Central Asia (CAS) and East Siberia (ESB)] showed small but~~  
467 ~~significant decreasing trends in the cold season but non-significant trends in the warm season.~~  
468 The seasonal features in each regional contribution described above enabled explanation of  
469 the cause of the seasonality of increasing trend in total O<sub>3</sub> over Japan as follows. The largest  
470 increasing trend of total O<sub>3</sub> in spring was predominantly attributed to the large increasing  
471 trend in contributions of source regions in northeast Asia (CHN, KOR, E-Asia-Seas, and JPN).  
472 The increasing trends in the contributions of CHN, KOR, and JPN were smaller in summer,  
473 however, partly compensated by the growth of increasing trends in the FT and WSSE Asian  
474 contributions from spring to summer. In the cold season, trends for most regions were smaller  
475 than in the warm season, except for JPN. The increasing trend in contributions of northeast  
476 Asian regions differed little between fall and winter; however, those of FT, WSSE Asia, and  
477 Remote had larger increasing trends in winter than in fall, which made the increasing trend of  
478 total O<sub>3</sub> in winter larger than in fall.

479 Table 1 summarizes the linear trends of annual mean tagged O<sub>3</sub> tracers and the total O<sub>3</sub>  
480 averaged over JPN-ALL. The vast majority (about 97 %) of the trend in total O<sub>3</sub> was balanced  
481 with the sum of those trends in regional contributions with statistical significance. The largest  
482 contribution was from the increase of O<sub>3</sub> produced in CHN (0.85 ppbv/decade), which  
483 corresponded to about 36 % of the increasing trend of total O<sub>3</sub>. The increasing trend in the  
484 contribution of the total FT was also large (0.37 ppbv/decade), representing about 16 % of the  
485 total O<sub>3</sub> trend. The contributions of northeast Asian regions other than CHN also increased  
486 significantly (0.34, 0.29, and 0.27 ppbv/decade for KOR, E-Asia-Seas, and JPN, respectively)  
487 and each accounted for about 12–15 % of the total O<sub>3</sub> trend. About 7 % of the total O<sub>3</sub> trend  
488 was attributable to the increasing trend in WSSE Asian contributions (0.16 ppbv/decade). The  
489 linear trends in the contributions of remaining regions [~~CN-Asia, Remote, stratosphere, and~~  
490 ~~the others (OTH)] were small and non-significant, and so were not important concerning the  
491 cause of reported surface O<sub>3</sub> increase over Japan.~~

492

### 493 **3.3 Impact of ~~IAVs-temporal variations~~ in O<sub>3</sub> precursor emissions in different** 494 **source regions on regional O<sub>3</sub> production**

495 The results in the preceding section revealed the relative importance of O<sub>3</sub> produced in  
496 different regions to the recent increasing trend in surface O<sub>3</sub> over Japan. It is noteworthy that  
497 this does not indicate the relative importance of the different regions of O<sub>3</sub> precursor  
498 emissions. For example, there were significant contributions of E-Asia-Seas to the increasing  
499 trend in surface O<sub>3</sub> over Japan, but there were clearly no large emission sources of precursors  
500 in these maritime regions other than navigation. The increasing trend in the contribution of E-  
501 Asia-Seas was likely a consequence of increased transport of O<sub>3</sub> precursors to this region,  
502 which had been emitted in adjacent land areas. However, the tracer-tagging approach cannot  
503 distinguish the differences in origins of emissions of precursors that resulted in O<sub>3</sub> production  
504 in E-Asia-Seas. To further investigate the roles of different regions in the recent increasing

505 trend of surface O<sub>3</sub> over Japan, we performed a series of sensitivity simulations with different  
506 assumptions for the temporal variation of factors, which would affect the surface O<sub>3</sub> over  
507 Japan. Each sensitivity simulation consisted of a 26-year simulation with full-chemistry setup  
508 of CHASER followed by another 26-year simulation with tracer-tagging setup of CHASER.  
509 Initially, a sensitivity simulation was performed that was only forced by the IAVs in the  
510 climate (~~NCEP/NCAR meteorology and HadISST data~~) but with all emissions of O<sub>3</sub>  
511 precursors, CH<sub>4</sub> concentration, and stratospheric O<sub>3</sub> fixed at the year 1980 level; then we  
512 gradually added the ~~increase of the IAV~~temporal variation of chemical factors as summarized  
513 in Table 2. The simulation F, driven by the ~~IAV~~temporal variation of all forcings, was  
514 identical to the standard simulation; and simulation A was mentioned concerning lightning-  
515 NO<sub>x</sub> emission in the preceding section (3.2).

516 The linear trends of annual mean total O<sub>3</sub> and tagged O<sub>3</sub> tracers that had significant effects  
517 on the standard simulation averaged over all of Japan in all simulations are shown and  
518 compared in Fig. 9. Simulation A showed no obvious increasing trend in total O<sub>3</sub> over Japan.  
519 The surface temperature over Japan in the model which was assimilated into NCEP/NCAR  
520 reanalysis data showed a warming of  $0.44 \pm 0.21$  °C/decade in the annual mean during the  
521 simulation period which well corresponded to the observed warming of  $0.45 \pm 0.23$  °C/decade  
522 (JMA, 2017). The IAV of the surface temperature was well captured by the model too,  
523 although the modelled temperature was somewhat warmer than the observation in 2000s  
524 particularly in winter which might be related to the slight overestimation of winter surface O<sub>3</sub>  
525 in the model depicted in Fig.5. The JPN and total FT contributions exhibited increasing trends  
526 (0.12 and 0.06 ppbv/decade, respectively), likely due to the IAV of the climate, but they were  
527 non-significant.

528 The increase in atmospheric concentration of CH<sub>4</sub> was added in simulation B, because this  
529 would have a non-negligible impact on tropospheric O<sub>3</sub> (background O<sub>3</sub> in particular), as  
530 frequently reported (Brasseur et al., 2006; Kawase et al., 2011; HTAP, 2010 and references  
531 therein). In the simulations other than A, we used a CH<sub>4</sub> concentration increase rate of about  
532 12.3 ppbv/year (0.73 %/year) during 1980–2000 and flattened thereafter. In simulation B, the  
533 contribution of the total FT showed a significant increasing trend (0.18 ppbv/decade) as did  
534 that of Remote (0.08 ppbv/decade; data not shown). The contributions of several other regions  
535 such as CHN, E-Asia-Seas, and WSSE Asia also showed slight increasing trends  
536 (approximately 0.01–0.02 ppbv/decade), although non-significant. Note that these values  
537 included the impact of CH<sub>4</sub> increase as well as the IAV of the climate and, consequently, the  
538 total O<sub>3</sub> in simulation B showed a significant increasing trend of about 0.44 ppbv/decade,  
539 representing about 19 % of the increasing trend in total O<sub>3</sub> in the standard simulation (2.37  
540 ppbv/decade).

541 In simulations C–E, the ~~IAVs~~temporal variations in emission of O<sub>3</sub> precursors in northeast  
542 Asian regions were gradually added: CHN, KOR, and JPN, respectively. The increase in  
543 emissions of O<sub>3</sub> precursors in CHN in simulation C caused a large significant increasing trend  
544 in the contribution of CHN itself (0.83 ppbv/decade). Moreover, the emission increase in  
545 CHN also had a large impact on the contributions of other regions, in particular, the increase  
546 trends in the contributions of KOR and E-Asia-Seas became significant: 0.12 and 0.15  
547 ppbv/decade, respectively. The JPN and the total FT contributions also showed somewhat  
548 larger increasing trends in simulation C than in B, but the growth in trends between the two  
549 simulations was not as large as those of KOR and E-Asia-Seas. The total effect of the  
550 emission increase in CHN on the increasing trend in surface O<sub>3</sub> over Japan, assessed using the  
551 difference in total O<sub>3</sub> trend between simulations B and C, was about 1.08 ppbv/decade and  
552 corresponded to about 46 % of the increasing trend in total O<sub>3</sub> in the standard simulation. The



553 relative contribution of CHN as a source region of O<sub>3</sub> production to the surface O<sub>3</sub> increasing  
554 trend over Japan was estimated as 36 % in the preceding section (3.2); however, the  
555 contribution of CHN as a source region of O<sub>3</sub> precursors emission was somewhat (10 %)   
556 larger due to the production of O<sub>3</sub> outside CHN. It is noteworthy that the slight increasing  
557 trend in the contribution of WSSE Asia shown in the CH<sub>4</sub> increase in simulation B was  
558 smaller in simulation C. The contributions of Remote and the stratosphere showed similar  
559 responses. The increase in O<sub>3</sub> precursor emissions in CHN seemed to partly offset the  
560 increase in influence of long range transport of O<sub>3</sub> from such regions.

561 The increase in emissions from KOR in addition to CHN in simulation D gave rise to a  
562 much larger increasing trend in the contributions of KOR itself (0.38 ppbv/decade).  
563 Compared with simulation C (0.12 ppbv/decade), about one-third of the increasing trend in  
564 the contribution of KOR was attributed to the O<sub>3</sub> precursor emission increase in CHN and the  
565 rest to emission increase in KOR. Similarly, the emission increase in KOR caused a larger  
566 increasing trend in the contributions of E-Asia-Seas in simulation D (0.25 ppbv/decade). We  
567 attributed about half of the increasing trend in the contribution of E-Asia-Seas in the standard  
568 simulation (0.29 ppbv/decade) to the impact of O<sub>3</sub> precursor emission increase in CHN (and  
569 partly that of the CH<sub>4</sub> increase: 0.15 ppbv/decade) as shown in simulation C, about one-third  
570 to that in KOR, and the rest to that in regions other than northeast Asia. By further adding the  
571 IAV-temporal variation in the domestic (JPN) emissions in simulation E, the increasing trend  
572 in the domestic contribution became significant (0.28 ppbv/decade), implying that the  
573 increasing trend in domestically produced O<sub>3</sub> was from a combination of multiple factors each  
574 of which did not cause a significant increase. The total effect of the emission increase in KOR  
575 on the increasing trend in surface O<sub>3</sub> over Japan assessed as the difference between  
576 simulations C and D was about 0.38 ppbv/decade; and that of the IAV of domestic emission  
577 in Japan assessed as the difference between simulations D and E was about 0.09 ppbv/decade;  
578 each of which corresponded to about 16 and 4 % of the increasing trend in total O<sub>3</sub> in the  
579 standard simulation, respectively.

580 The IAV in emissions of O<sub>3</sub> precursors in northeast Asian regions (CHN, KOR, and JPN)  
581 together with the IAV in the climate and the increase in CH<sub>4</sub> concentration induced a  
582 significant increasing trend in total O<sub>3</sub> over Japan with a rate of 1.99 ppbv/decade. This  
583 accounted for about 84 % of the increasing trend in total O<sub>3</sub> in the standard simulation. The  
584 rest of the increasing trend should be regarded as from O<sub>3</sub> precursor emission changes in  
585 regions other than northeast Asia. The difference between simulations E and F (standard  
586 simulation) showed that the emission change in such regions influenced surface O<sub>3</sub> over Japan  
587 mainly through increasing the O<sub>3</sub> production in WSSE Asia and the FT (Fig. 9).

588

#### 589 **4 Summary and conclusion**

590 We demonstrated the relative importance of the regions of photochemical O<sub>3</sub> production in  
591 the global atmosphere on the long-term increasing trend in surface O<sub>3</sub> over Japan reported in  
592 recent decades by conducting a series of tracer-tagging simulations using the global CTM  
593 CHASER. The impact of the IAVs of climate, of CH<sub>4</sub> concentration, and of emission of O<sub>3</sub>  
594 precursors (NO<sub>x</sub> and NMVOC) in different source regions on regional photochemical O<sub>3</sub>  
595 production were also investigated.

596 The observed increasing trend of surface O<sub>3</sub> over Japan for 1980–2005 (2.70 ppbv/decade  
597 for annual mean over whole Japan) was successfully reproduced by the model (2.58  
598 ppbv/decade) including an obvious tendency of increase toward western Japan and to be  
599 greater in the warm (spring–summer) than in the cold season (fall–winter).

600 The absolute contribution of each photochemical O<sub>3</sub> production region to the surface O<sub>3</sub> over  
601 Japan represented by the concentrations of tagged O<sub>3</sub> tracer showed different temporal  
602 evolution by regions. The contributions of all Asian regions except the northern part (i.e.,  
603 CHN, KOR, E-Asia-Seas, JPN, and WSSE) as well as those of the total FT exhibited  
604 significant increasing trends during the period. The increasing trend in the contribution of  
605 domestically produced O<sub>3</sub> in Japan (i.e., JPN) did not differ much among the different regions  
606 in Japan. However, there was a tendency in the increasing trends in contributions of CHN,  
607 KOR, and E-Asia-Seas to be large toward western Japan, which was a main cause of the same  
608 tendency in the increasing trend in total O<sub>3</sub> and suggested a large impact of intra-regional  
609 transboundary air pollution in East Asia.

610 The trends in contributions of most O<sub>3</sub> production regions, except JPN, were larger in the  
611 warm than in the cold season, providing a basis for the seasonality in the increasing trend in  
612 total O<sub>3</sub> over Japan. Thus, the larger increasing trend of total O<sub>3</sub> in spring than in summer was  
613 mainly due to the same tendency in increasing trends in the contributions of northeast Asian  
614 regions (CHN, KOR, and JPN), although this was partly compensated by larger increasing  
615 trends in the FT and WSSE Asia contributions in summer than spring. In the cold season, the  
616 contributions of FT, WSSE Asia, and Remote had larger increasing trends in winter than in  
617 fall, which led to a larger increasing trend in total O<sub>3</sub> in winter than in fall.

618 The sum of the trends in contributions of O<sub>3</sub> production regions with sufficient statistical  
619 significance accounted for most (about 97 %) of the increasing trend in total O<sub>3</sub> over Japan  
620 (2.37 ppbv/decade). The largest portion was attributed to the increasing trend of O<sub>3</sub> produced  
621 in CHN (36 %; 0.85 ppbv/decade), followed by that in the total FT (16 %; 0.37 ppbv/decade).  
622 The increasing trend in contributions of the other northeast Asian regions (KOR, E-Asia-Seas,  
623 and JPN; 0.27–0.34 ppbv/decade) each accounted for about 12–15 % of the total O<sub>3</sub> trend, and  
624 the majority of the rest of the total O<sub>3</sub> trend (7 %; 0.16 ppbv/decade) was attributable to  
625 WSSE Asia.

626 We further investigated the impact of the IAV-temporal variation of controlling factors, such  
627 as climate, CH<sub>4</sub> concentration, and emission of O<sub>3</sub> precursors, on photochemical O<sub>3</sub>  
628 production in different source regions and its influence on the long-term increasing trend in  
629 surface O<sub>3</sub> over Japan through a series of sensitivity simulations that gradually added the IAV  
630 temporal variation of these factors. The IAV of the climate and the increase in CH<sub>4</sub>  
631 concentration together caused the increase of photochemical O<sub>3</sub> production in several regions  
632 and resulted in the significant increasing trend in surface O<sub>3</sub> over Japan (0.44 ppbv/decade)  
633 and represented about 19 % of the increasing trend in surface O<sub>3</sub> in the standard simulation.  
634 The increase in emission of O<sub>3</sub> precursors in CHN led to the increase of photochemical O<sub>3</sub>  
635 production in northeast Asian regions including CHN itself, KOR, JPN, and E-Asia-Seas; and  
636 the resulting increasing trend in surface O<sub>3</sub> over Japan (1.08 ppbv/decade) accounted for  
637 about 46 % of that in the standard simulation. The relative contribution of CHN to the surface  
638 O<sub>3</sub> increasing trend over Japan as the source region of O<sub>3</sub> precursor “emission” was 10 %  
639 larger than as the source region of O<sub>3</sub> “production” due to production of O<sub>3</sub> outside of CHN.  
640 Then, the impact of the O<sub>3</sub> precursor emission change in KOR and JPN on the increasing  
641 trend in surface O<sub>3</sub> over Japan (about 0.38 and 0.10 ppbv/decade, respectively) corresponded  
642 to 16 and 4 % of the increasing trend in total O<sub>3</sub> in the standard simulation, respectively. The  
643 rest of the increasing trend in total O<sub>3</sub> in the standard simulation (about 16 %) was attributed  
644 to O<sub>3</sub> precursor emission change in regions other than northeast Asia, mainly through  
645 increasing the photochemical O<sub>3</sub> production in WSSE Asia and the total FT.

646 The results summarized above depended largely on the forcings of long-term simulation,  
647 particularly the long-term variation of the emissions of O<sub>3</sub> precursors in Asia. Zhao et al.  
648 (2013) estimated the NO<sub>x</sub> emission in China for the period 1995–2010 and compared it to the  
649 existing emission inventories including Hao et al. (2002), Zhan et al. (2007), and the version  
650 of REAS used in this study. They showed the long-term increasing trend in Chinese NO<sub>x</sub>  
651 emission in REAS was consistent with that in the other inventories, but the amount of  
652 emission was somewhat smaller in REAS than in the others. Therefore, the long-term  
653 increasing trend in the contribution of Chinese emission to the surface O<sub>3</sub> over Japan showed  
654 in the preset study would be retained if the other emission inventories were used for the  
655 simulation but the specific values of the contributions could be affected. Further studies  
656 should address the impact these uncertainties in the different emission inventories on the trend  
657 of surface O<sub>3</sub> over Japan.

658

659 *Acknowledgements.* This research was supported by the Global Environment Research Fund  
660 (S-7) by the Ministry of the Environment (MOE) of Japan and the East Asian Environment  
661 Research Program at the National Institute for Environmental Studies (NIES). We  
662 acknowledge the entire staff of the EANET and the AEROS air quality monitoring stations of  
663 the MOE of Japan and of the local governments for carrying out measurements and providing  
664 the observations. The calculations were performed on the NIES supercomputer system (NEC  
665 SX-8R, SX9). The GFD-DENNOU library was used for drawing the figures.

666

667 **References**

- 668 Akimoto, H., Mori, Y., Sasaki, K., Nakanishi, H., Ohizumi, T., and Itano, Y.: Analysis of  
669 monitoring data of ground-level ozone in Japan for longterm trend during 1990–2010:  
670 Causes of temporal and spatial variation, *Atmos. Environ.*, 102, 302–310, 2015.
- 671 Akiyoshi, H., Zhou, L. B., Yamashita, Y., Sakamoto, K., Yoshiki, M., Nagashima, T.,  
672 Takahashi, T., Kurokawa, J., Takigawa, M., and T. Imamura, T.: A CCM simulation of the  
673 breakup of the Antarctic polar vortex in the years 1980–2004 under the CCMVal scenarios,  
674 *J. Geophys. Res.*, 114, D03103, doi:10.1029/2007JD009261, 2009.
- 675 Brasseur, G. P., Schultz, M., Granier, C., Saunois, M., Diehl, T., Botzet, M., and Roeckner,  
676 E.: Impact of climate change on the future chemical composition of the global troposphere,  
677 *J. Clim.*, 19, 3932–3951, doi:10.1175/JCLI3832.1, 2006.
- 678 Chang, S.-C. and Lee, C.-T.: Evaluation of the trend of air quality in Taipei, Taiwan from  
679 1994 to 2003, *Environ. Monit. Assess.*, 127, 87–96, doi:10.1007/s10661-006-9262-1, 2007.
- 680 Chou, C. C.-K., Liu, S. C., Lin, C.-Y., Shiu, C.-J., and Chang, K.-H.: The trend of surface  
681 ozone in Taipei, Taiwan, and its causes: Implications for ozone control strategies, *Atmos.*  
682 *Environ.*, 40, 3898–3908, 2006.
- 683 Cooper, O. R., Parrish, D. D., Ziemke, J., Balashov, N. V., Cupeiro, M., Galbally, I. E., Gilge,  
684 S., Horowitz, L., Jensen, N. R., Lamarque, J.-F., Naik, V., Oltmans, S. J., Schwab, J.,  
685 Shindell, D. T., Thompson, A. M., Thouret, V., Wang, Y., and Zbinden, R. M.: Global  
686 distribution and trends of tropospheric ozone: An observation-based review, *Elementa*, 2,  
687 000029, doi: 10.12952/journal.elementa.000029, 2014.
- 688 Ding, A. J., Wang, T., Thouret, V., Cammas, J.-P., and Nédélec, P.: Tropospheric ozone  
689 climatology over Beijing: analysis of aircraft data from the MOZAIC program, *Atmos.*  
690 *Chem. Phys.*, 8, 1–13, 2008.
- 691 Eyring, V., Harris, N. R. P., Rex, M., Shepherd, T. G., Fahey, D. W., Amanatidis, G. T.,  
692 Austin, J., Chipperfield, M. P., Dameris, M., Forster, P. M. De F., Gettelman, A., Graf, H.  
693 F., Nagashima, T., Newman, P. A., Pawson, S., Prather, M. J., Pyle, J. A., Salawitch, R. J.,  
694 Santer, B. D., and Waugh, D. W.: A strategy for process-oriented validation of coupled  
695 chemistry-climate models. *Bull. Am. Meteorol. Soc.*, 86, 1117–1133, 2005.



696 [Hao, J. M., Tian, H. Z., and Lu, Y. Q.: Emission inventories of NO<sub>x</sub> from commercial energy](#)  
697 [consumption in China, 1995–1998, \*Environ. Sci. Technol.\*, 36, 552–560,](#)  
698 [doi:10.1021/Es015601k, 2002.](#)

699 HTAP, UNECE: Hemispheric Transport of Air Pollution 2010: Part A: Ozone and Particulate  
700 Matter, Air Pollution Studies No. 17, (ed. by Dentener, F., Keating, T., and Akimoto, H.),  
701 ECE/EN.Air/100, 2010.

702 [JMA \(Japan Meteorological Agency\): available online at](#)  
703 [http://www.data.jma.go.jp/cpdinfo/temp/list/an\\_jpn.html](http://www.data.jma.go.jp/cpdinfo/temp/list/an_jpn.html) (In Japanese), 2017.

704 Kalnay, E., Kanamitsu, M., Kistler, R., Collins, W., Deaven, D., Gandin, L., Iredell, M., Saha,  
705 S., White, G., Woollen, J., Zhu, Y., Leetmaa, A., Reynolds, B., Chelliah, M., Ebisuzaki,  
706 W., Higgins, W., Janowiak, J., Mo, K. C., Ropelewski, C., Wang, J., Jenne, R., and Joseph,  
707 D.: The NCEP/NCAR 40-year reanalysis project, *Bull. Amer. Meteor. Soc.*, 77, 437–470,  
708 1996.

709 Kawase, H., Nagashima, T., Sudo, K., and Nozawa, T.: Future changes in tropospheric ozone  
710 under Representative Concentration Pathways (RCPs), *Geophys. Res. Lett.*, 38, L05801,  
711 doi:10.1029/2010GL046402, 2011.

712 Kurokawa, J., Ohara, T., Uno, I., Hayasaka, M., and Tanimoto, H.: Influence of  
713 meteorological variability on interannual variations of springtime boundary layer ozone  
714 over Japan during 1981–2005, *Atmos. Chem. Phys.*, 9, 6287–6304, 2009.

715 Kurokawa, J., Ohara, T., Morikawa, T., Hanayama, S., Janssens-Maenhout, G., Fukui, T.,  
716 Kawashima, K., and Akimoto, H.: Emissions of air pollutants and greenhouse gases over  
717 Asian regions during 2000–2008: Regional Emission inventory in ASia (REAS) version 2,  
718 *Atmos. Chem. Phys.*, 13, 11019–11058, 2013.

719 Lee, H.-J., Kim, S.-W., Brioude, J., Cooper, O. R., Frost, G. J., Kim, C.-H., Park, R. J.,  
720 Trainer, M., and Woo J.-H.: Transport of NO<sub>x</sub> in East Asia identified by satellite and in  
721 situ measurements and Lagrangian particle dispersion model simulations, *J. Geophys. Res.*  
722 *Atmos.*, 119, 2574–2596, doi:10.1002/2013JD021185, 2014.

723 Li, J., Wang, Z. F., Akimoto, H., Yamaji, K., Takigawa, M., Pochanart, P., Liu, Y., Tanimoto,  
724 H., and Kanaya, Y.: Near-ground ozone source attributions and outflow in central eastern  
725 China during MTX2006, *Atmos. Chem. Phys.*, 8, 7335–7351, 2008.

726 Li, H. C., Chen, K. S., Huang, C. H., and Wang, H. K.: Meteorologically adjusted long-term  
727 trend of ground-level ozone concentrations in Kaohsiung County, southern Taiwan, *Atmos.*  
728 *Environ.*, 44, 3605–3608, 2010.

729 Lin, S.-J. and Rood, R. B.: Multidimensional flux-form semi-Lagrangian transport scheme,  
730 *Mon. Weather Rev.*, 124, 2046–2070, 1996.

731 Lin, Y.-K., Lin, T.-H., and Chang, S.-C.: The changes in different ozone metrics and their  
732 implications following precursor reductions over northern Taiwan from 1994 to 2007,  
733 *Environ. Monit. Assess.*, 169, 143–157, 2010.

734 Logan, J. A., Megretskaia, I. A., Miller, A. J., Tiao, G. C., Choi, D., Zhang, L., Stolarski, R.  
735 S., Labow, G. J., Hollandsworth, S. M., Bodeker, G. E., Claude, H., de Muer, D., Kerr, J.  
736 B., Tarasick, D. W., Oltmans, S. J., Johnson, B., Schmidlin, F., Staehelin, J., Viatte, P., and  
737 Uchino, O.: Trends in the vertical distribution of ozone: A comparison of two analyses of  
738 ozonesonde data, *J. Geophys. Res.*, 104, 26373–26399, 1999.

739 Lu, W.-Z. and Wang, X.-K.: Evolving trend and self-similarity of ozone pollution in central  
740 Hong Kong ambient during 1984–2002, *Sci. Total Environ.*, 357, 160–168, 2006.

741 Mauzerall, D. L., Sultan, B., Kim, N., and Bradford, D. F.: NO<sub>x</sub> emissions from large point  
742 sources: variability in ozone production, resulting health damages and economic costs,  
743 *Atmos. Environ.*, 39, 2851–2866, 2005.

744 Meinshausen, M., Smith, S. J., Calvin, K., Daniel, J. S., Kainuma, M. L. T., Lamarque, J.-F.,  
745 Matsumoto, K., Montzka, S. A., Raper, S. C. B., Riahi, K., Thomson, A., Velders, G. J. M.,  
746 and van Vuuren, D. P. P.: The RCP greenhouse gas concentrations and their extensions  
747 from 1765 to 2300, *Climatic Change*, 109, 213–241, 2011.

748 MOE (Ministry of Environment) Japan: FY 2013 status of air pollution, available online at:  
749 <http://www.env.go.jp/air/osen/jokyoh25/> (in Japanese), 2013.

750 Nagashima, T., Ohara, T., Sudo, K., and Akimoto, H.: The relative importance of various  
751 source regions on East Asian surface ozone, *Atmos. Chem. Phys.*, 10, 11305–11322, 2010.

752 Naja, M. and Akimoto, H.: Contribution of regional pollution and long-range transport to the  
753 Asia-Pacific region: Analysis of long-term ozonesonde data over Japan, *J. Geophys. Res.*,  
754 109, D21306, doi:10.1029/2004JD004687, 2004.

755 Nozawa, T., Nagashima, T., Shiogama, H., and Crooks, S. A.: Detecting natural influence on  
756 surface air temperature change in the early twentieth century, *Geophys. Res. Lett.*, 32,  
757 L20719, doi:10.1029/2005GL023540, 2005.

758 Ohara, T. and Sakata, T.: Long-term variation of photochemical oxidants over Japan, *J. Jpn.*  
759 *Soc. Atmos. Environ.*, 38, 47–54. (in Japanese with English summary), 2003.

760 Ohara, T., Yamaji, K., Uno, I., Tanimoto, H., Sugata, S., Nagashima, T., Kurokawa, J., Horii,  
761 N., and Akimoto, H.: Long-term simulations of surface ozone in East Asia during 1980–  
762 2020 with CMAQ and REAS inventory, In *Air Pollution Modelling and Its Application*  
763 *XIX (NATO Science for Peace and Security Series C: Environmental Security)* (ed. by  
764 Borrego, C., and Miranda, A. I.). Springer, Dordrecht, The Netherlands, 136–144, 2008.

765 Ohara, T., Akimoto, H., Kurokawa, J., Horii, N., Yamaji, K., Yan, X., and Hayasaka, T.: An  
766 Asian emission inventory of anthropogenic emission sources for the period 1980–2002,  
767 *Atmos. Chem. Phys.*, 7, 4410–4444, 2007.

768 Olivier, J. G. J. and Berdowski, J. J. M.: Global emissions sources and sinks, in: *The Climate*  
769 *System*, Berdowski, J., Guicherit, R., and Heij, B. J. (eds.), A. A. Balkema Publishers/  
770 Swets & Zeitlinger Publishers, Lisse, The Netherlands, 33–78, 2001.

771 Oltmans, S. J., Lefohn, A. S., Harris, J. M., Galbally, I., Scheel, H. E., Bodeker, G., Brunke,  
772 E., Claude, H., Tarasick, D., Johnson, B. J., Simmonds, P., Shadwick, D., Anlauf, K.,  
773 Hayden, K., Schmidlin, F., Fujimoto, T., Akagi, K., Meyer, C., Nichol, S., Davies, J.,  
774 Redondas, A., and Cuevas, E.: Long-term changes in tropospheric ozone, *Atmos. Environ.*,  
775 40, 3156–3173, 2006.

776 Oltmans, S. J., Lefohn, A. S., Shadwick, D., Harris, J. M., Scheel, H. E., Galbally, I., Tarasick,  
777 D. W., Johnson, B. J., Brunke, E.-G., Claude, H., Zeng, G., Nichol, S., Schmidlin, F.,  
778 Davies, J., Cuevas, E., Redondas, A., Naoe, H., Nakano, T., and Kawasato, T.: Recent  
779 tropospheric ozone changes – A pattern dominated by slow or no growth, *Atmos. Environ.*,  
780 67, 331–351, 2013.

781 Parrish, D. D., Law, K. S., Staehelin, J., Derwent, R., Cooper, O. R., Tanimoto, H., Volz-  
782 Thomas, A., Gilge, S., Scheel, H.-E., Steinbacher, M., and Chan, E.: Long-term changes in  
783 lower tropospheric baseline ozone concentrations at northern mid-latitudes, *Atmos. Chem.*  
784 *Phys.*, 12, 11485–11504, 2012.

785 Rayner, N. A., Parker, D. E., Horton, E. B., Folland, C. K., Alexander, L. V., Rowell, D. P.,  
786 Kent, E. C., and Kaplan, A.: Global analyses of sea surface temperature, sea ice, and night  
787 marine air temperature since the late nineteenth century, *J. Geophys. Res.*, 108, 4407,  
788 doi:10.1029/2002JD002670, 2003.

789 Schultz, M. G., Heil, A., Hoelzemann, J. J., Spessa, A., Thonicke, K., Goldammer, J. G., Held,  
790 A. C., Pereira, J. M. C., and van het Bolscher, M.: Global wildland fire emissions from  
791 1960 to 2000, *Global Biogeochem. Cycles*, 22, GB2002, doi:10.1029/2007GB003031,  
792 2008.

793 Seo, J., Youn, D., Kim, J. Y., and Lee, H.: Extensive spatiotemporal analyses of surface  
794 ozone and related meteorological variables in South Korea for the period 1999–2010,  
795 *Atmos. Chem. Phys.*, 14, 6395–6415, 2014.

796 Shindell, D., Kuylenstierna, J. C. I., Faluvegi, G., Milly, G., Emberson, L., Hicks, K., Vignati,  
797 E., Van Dingenen, R., Janssens-Maenhout, G., Raes, F., Pozzoli, L., Amann, M., Klimont,  
798 Z., Kupiainen, K., Höglund-Isaksson, L., Anenberg, S. C., Muller, N., Schwartz, J., Streets,  
799 D., Ramanathan, V., Oanh, N. T. K., Williams, M., Demkine, V., and Fowler, D.:  
800 Simultaneously mitigating near-term climate change and improving human health and food  
801 security, *Science*, 335, 183–189, 2012.

802 Silva, R. A., West, J. J., Zhang, Y., Anenberg, S. C., Lamarque, J.-F., Shindell, D. T., Collins,  
803 W. J., Dalsoren, S., Faluvegi, G., Folberth, G., Horowitz, L. W., Nagashima, T., Naik, V.,  
804 Rumbold, S., Skeie, F., Sudo, K., Takemura, T., Bergmann, D., Cameron-Smith, P., Cionni,  
805 I., Doherty, R. M., Eyring, V., Josse, B., MacKenzie, I. A., Plummer, D., Righi, M.,  
806 Stevenson, D. S., Strode S., Szopa, S., and Zeng, G.: Global premature mortality due to  
807 anthropogenic outdoor air pollution and the contribution of past climate change, *Environ.*  
808 *Res. Lett.*, 8, 034005, 2013.

809 Sudo, K. and Akimoto, H.: Global source attribution of tropospheric ozone: Long-range  
810 transport from various source regions, *J. Geophys. Res.*, 112, D12302,  
811 doi:10.1029/2006JD007992, 2007.

812 Sudo, K., Takahashi, M., Kurokawa, J., and Akimoto, H.: CHASER: A global chemical  
813 model of the troposphere: 1. Model description, *J. Geophys. Res.*, 107(D17), 4339,  
814 doi:10.1029/2001JD001113, 2002.



815 Susaya, J., Kim, K.-H., Shon, Z.-H., and Brown, R. J. C.: Demonstration of long-term  
816 increases in tropospheric O<sub>3</sub> levels: Causes and potential impacts, *Chemosphere*, 92, 1520–  
817 1528, 2013.

818 Tanimoto, H.: Increase in springtime tropospheric ozone at a mountainous site in Japan for  
819 the period 1998–2006, *Atmos. Environ.*, 43, 1358–1363, 2009.

820 Tanimoto, H., Ohara, T., and Uno, I.: Asian anthropogenic emissions and decadal trends in  
821 springtime tropospheric ozone over Japan: 1998–2007, *Geophys. Res. Lett.*, 36, L23802,  
822 doi:10.1029/2009GL041382, 2009.

823 UNEP (United Nations Environment Programme) and WMO (World Meteorological  
824 Organization): Integrated Assessment of Black Carbon and Tropospheric Ozone: Summary  
825 for Decision Makers, available online at  
826 [http://www.unep.org/dewa/Portals/67/pdf/Black\\_Carbon.pdf](http://www.unep.org/dewa/Portals/67/pdf/Black_Carbon.pdf), 2011.

827 US EPA (U.S. Environmental Protection Agency): Air Quality Criteria for Ozone and Related  
828 Photochemical Oxidants (Final), U.S. Environmental Protection Agency, Washington, DC,  
829 EPA/600/R-05/004aF-cF, 2006.

830 Van Aardenne, J. A., Dentener, F. J., Olivier, J. G. J., Klein Goldewijk, C. G. M., and  
831 Lelieveld, J.: A 1 x 1 degree resolution dataset of historical anthropogenic trace gas  
832 emissions for the period 1890–1990, *Global Biogeochem. Cy.*, 15(4), 909–928, 2001.

833 Van Leer, B.: Toward the ultimate conservative difference scheme. IV: A new approach to  
834 numerical convection, *J. Comput. Phys.*, 23, 276–299, 1977.

835 Wakamatsu, S., Morikawa, T., and Ito, A.: Air Pollution Trends in Japan between 1970 and  
836 2012 and Impact of Urban Air Pollution Countermeasures, *Asian J. Atmos. Env.*, 7(4),  
837 177–190, 2013.

838 Wang, X. and Mauzerall, D. L.: Characterizing distributions of surface ozone and its impact  
839 on grain production in China, Japan and South Korea: 1990 and 2020, *Atmos. Environ.*, 38,  
840 4383–4402, 2004.

841 Wang, T., Wei, X. L., Ding, A. J., Poon, C. N., Lam, K. S., Li, Y. S., Chan, L. Y., and Anson,  
842 M.: Increasing surface ozone concentrations in the background atmosphere of Southern  
843 China, 1994–2007, *Atmos. Chem. Phys.*, 9, 6217–6227, 2009.

844 Wang, Y., Zhang, Y., Hao, J., and Luo, M.: Seasonal and spatial variability of surface ozone  
845 over China: contributions from background and domestic pollution, *Atmos. Chem. Phys.*,  
846 11, 3511–3525, 2011.

847 Xu, X., Lin, W., Wang, T., Yan, P., Tang, J., Meng, Z., and Wang, Y.: Long-term trend of  
848 surface ozone at a regional background station in eastern China 1991–2006: enhanced  
849 variability, *Atmos. Chem. Phys.*, 8, 2595–2607, 2008.

850 [Zhang, Q., Streets, D. G., He, K., Wang, Y., Richter, A., Burrows, J. P., Uno, I., Jang, C. J.,](#)  
851 [Chen, D., Yao, Z., and Lei, Y.: NO<sub>x</sub> emission trends for China, 1995–2004: The view from](#)  
852 [the ground and the view from space, \*J. Geophys. Res.-Atmos.\*, 112,](#)  
853 [doi:10.1029/2007jd008684, 2007.](#)

854 Zhang, Q., Yuan, B., Shao, M., Wang, X., Lu, S., Lu, K., Wang, M., Chen, L., Chang, C.-C.,  
855 and Liu, S. C.: Variations of ground-level O<sub>3</sub> and its precursors in Beijing in summertime  
856 between 2005 and 2011, *Atmos. Chem. Phys.*, 14, 6089–6101, 2014.

857 [Zhao, B., Wang, S. X., Liu, H., Xu, J. Y., Fu, K., Klimont, Z., Hao, J. M., He, K. B., Cofala,](#)  
858 [J., and Amann M.: NO<sub>x</sub> emissions in China: historical trends and future perspectives,](#)  
859 [\*Atmos. Chem. Phys.\*, 13, 9869–9897, 2013.](#)

860

861

862 **Table 1.** Summary of the linear trends of annual mean tagged O<sub>3</sub> tracers as well as the total O<sub>3</sub>  
 863 averaged over Japan (JPN-ALL) for 1980–2005. Bold figures denote that trends are  
 864 significant at 5 % risk level.

| Source Region | Trend [ppbv/dec]   | Percent |
|---------------|--------------------|---------|
| CHN           | <b>0.85 ± 0.2</b>  | 35.8    |
| KOR           | <b>0.34 ± 0.14</b> | 14.6    |
| JPN           | <b>0.27 ± 0.19</b> | 11.5    |
| E-Asia-Seas   | <b>0.29 ± 0.05</b> | 12.4    |
| WSSE Asia     | <b>0.16 ± 0.04</b> | 6.8     |
| CN Asia       | -0.05 ± 0.08       | -2.1    |
| Remote        | 0.04 ± 0.08        | 1.7     |
| OTH           | 0.01 ± 0.02        | 0.5     |
| FT            | <b>0.37 ± 0.1</b>  | 15.5    |
| Strat.        | 0.08 ± 0.28        | 3.3     |
| Total         | <b>2.37 ± 0.42</b> | 100.0   |

865

866

867 **Table 2.** Summary of the sensitivity simulations and the standard simulation

| Simulation code | CH <sub>4</sub> concentration | O <sub>3</sub> precursor emissions                  |                           |                           |                           | Stratospheric O <sub>3</sub> trend |
|-----------------|-------------------------------|-----------------------------------------------------|---------------------------|---------------------------|---------------------------|------------------------------------|
|                 |                               | CHN                                                 | KOR                       | JPN                       | ROW <sup>a</sup>          |                                    |
| A               | 1980 <sup>b</sup>             | 1980                                                | 1980                      | 1980                      | 1980                      | 1980                               |
| B               | increase <sup>c</sup>         | 1980                                                | 1980                      | 1980                      | 1980                      | 1980                               |
| C               | increase                      | <del>IAV</del> <sup>d</sup> <u>Var</u> <sup>d</sup> | 1980                      | 1980                      | 1980                      | 1980                               |
| D               | increase                      | <del>IAV</del> <u>Var</u>                           | <del>IAV</del> <u>Var</u> | 1980                      | 1980                      | 1980                               |
| E               | increase                      | <del>IAV</del> <u>Var</u>                           | <del>IAV</del> <u>Var</u> | <del>IAV</del> <u>Var</u> | 1980                      | 1980                               |
| F (standard)    | increase                      | <del>IAV</del> <u>Var</u>                           | <del>IAV</del> <u>Var</u> | <del>IAV</del> <u>Var</u> | <del>IAV</del> <u>Var</u> | <del>IAV</del> <u>Var</u>          |

868 a Precursor emissions in the Rest Of the World (ROW) other than CHN, KOR, and JPN

869 b Each factor was fixed at the year 1980 level

870 c CH<sub>4</sub> concentration increased until 2000 and flattened thereafter

871 d ~~InterAnnual-Temporal~~ Variation (~~IAV~~Var) of each factor was considered



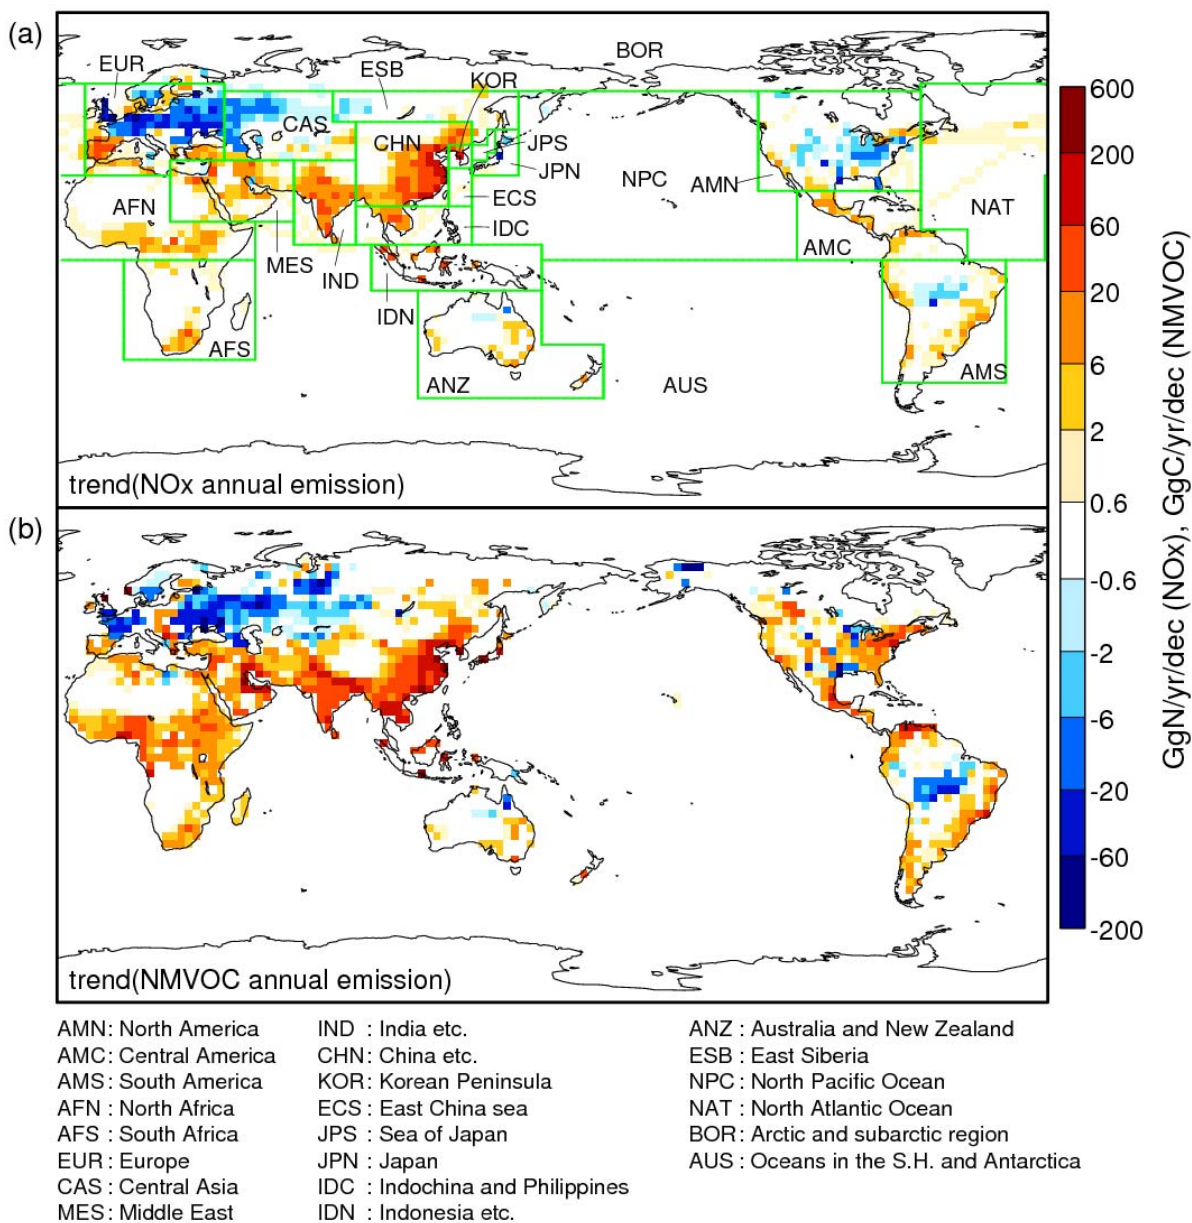

872

873 **Figure 1.** Linear trends of (a) NO<sub>x</sub> and (b) NMVOC emission during the simulation period

874 (1980–2005) used in the study. Significant trends at 5 % risk level are colored. Source regions

875 for tracer tagging are also displayed in the top figure.

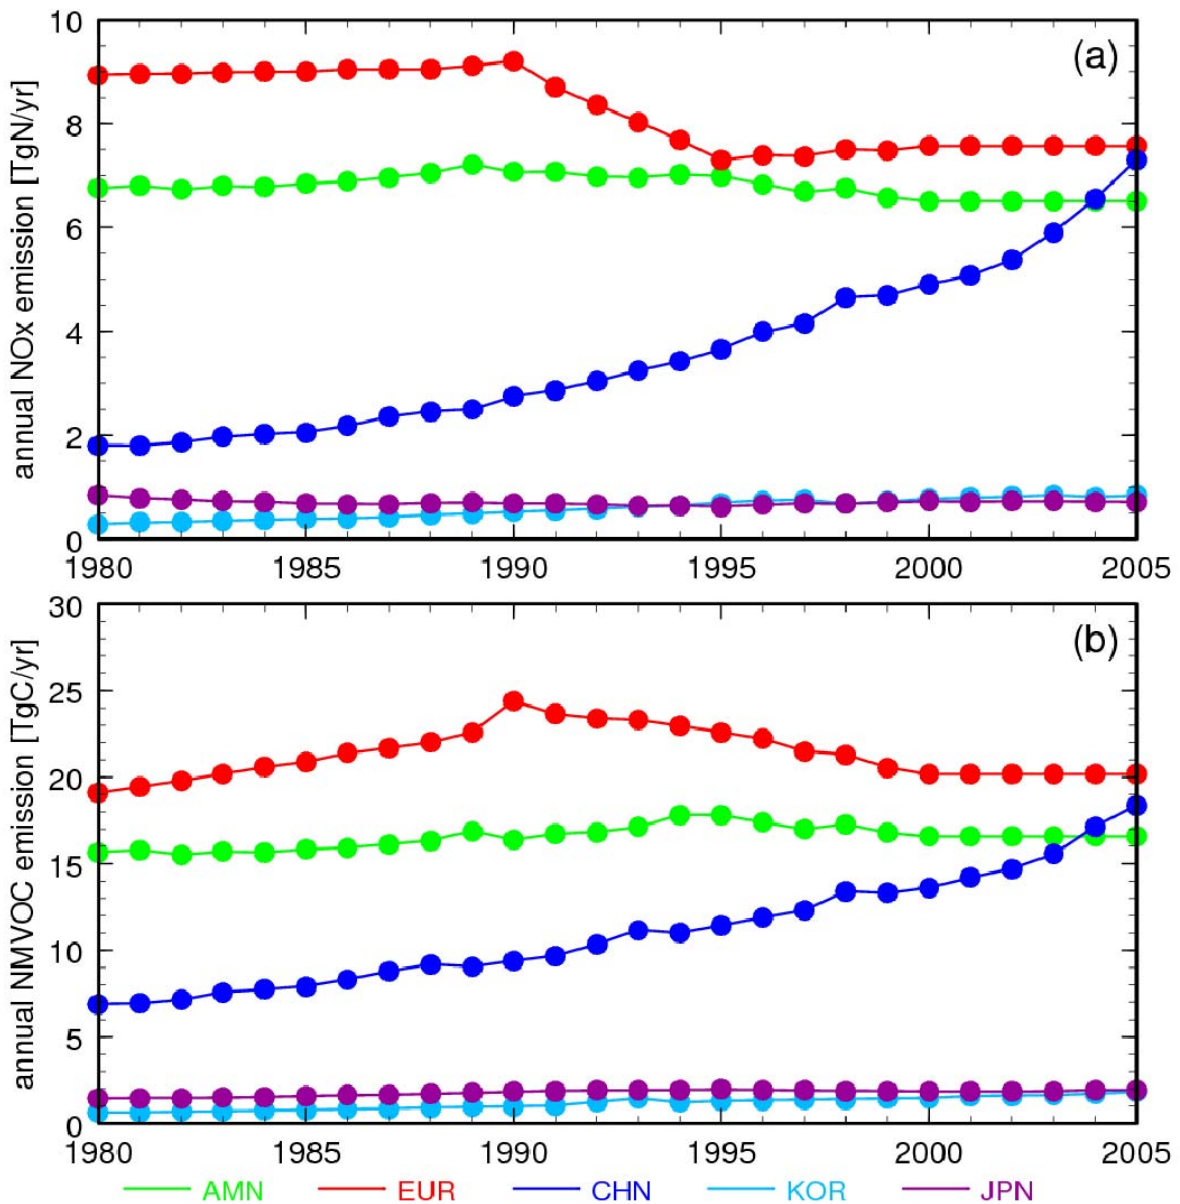

876

877 **Figure 2.** Temporal evolution of emissions of (a) NO<sub>x</sub> and (b) NMVOC averaged over several

878 source areas in the Northern Hemisphere depicted in Fig. 1.

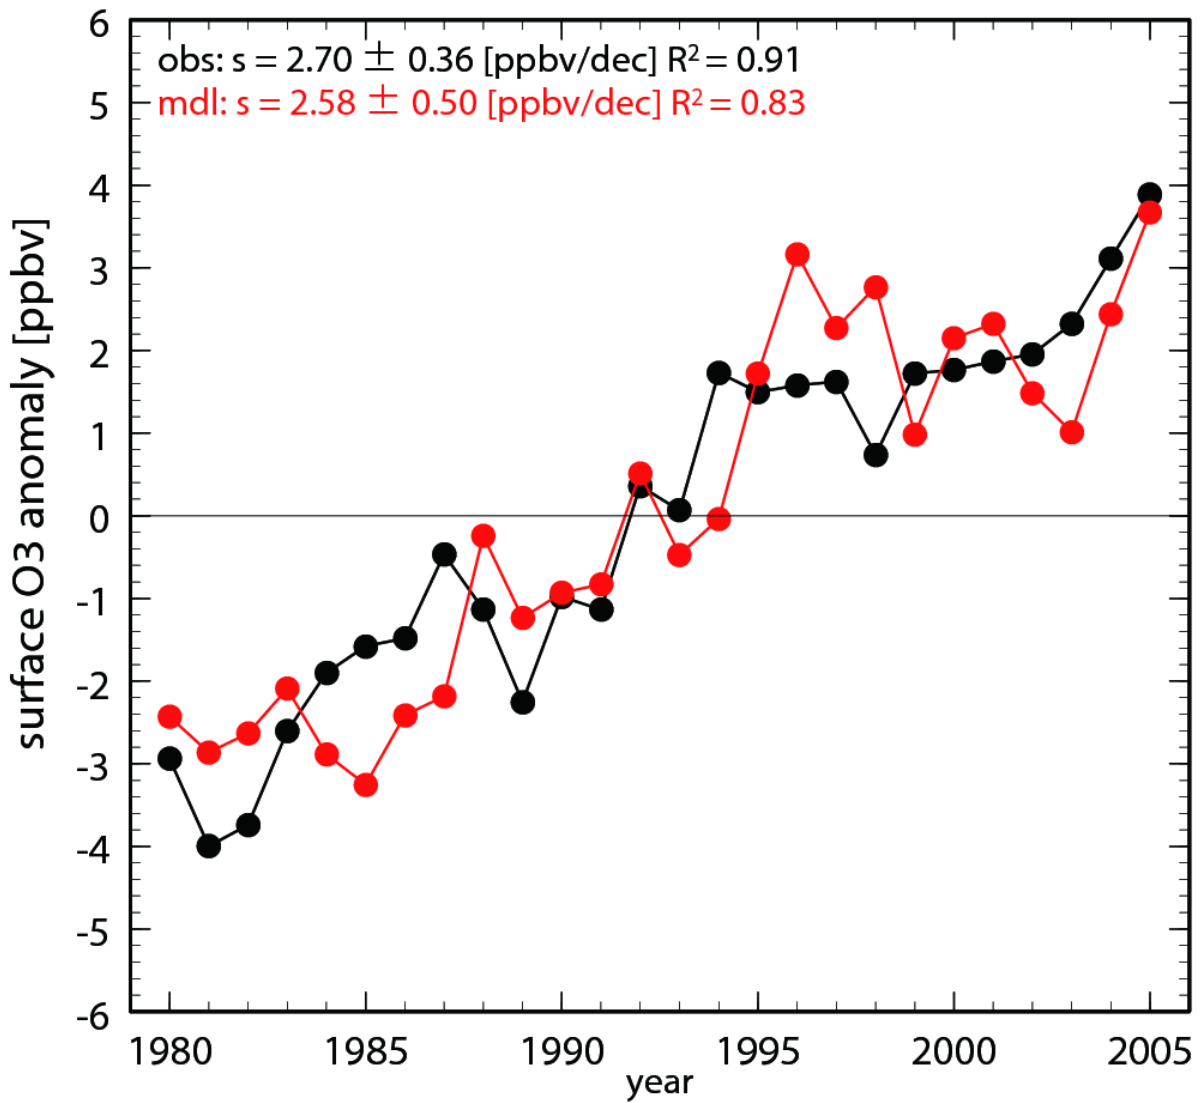

879

880 **Figure 3.** The temporal changes of annual mean surface O<sub>3</sub> anomaly averaged over Japan  
 881 from observation (AEROS: black) and model calculation (red). Anomalies are defined as  
 882 deviations from the values averaged over 1980–2005. The slope of a regression (s) for 1980–  
 883 2005 with their 95 % confidence interval and R<sup>2</sup> are also shown.

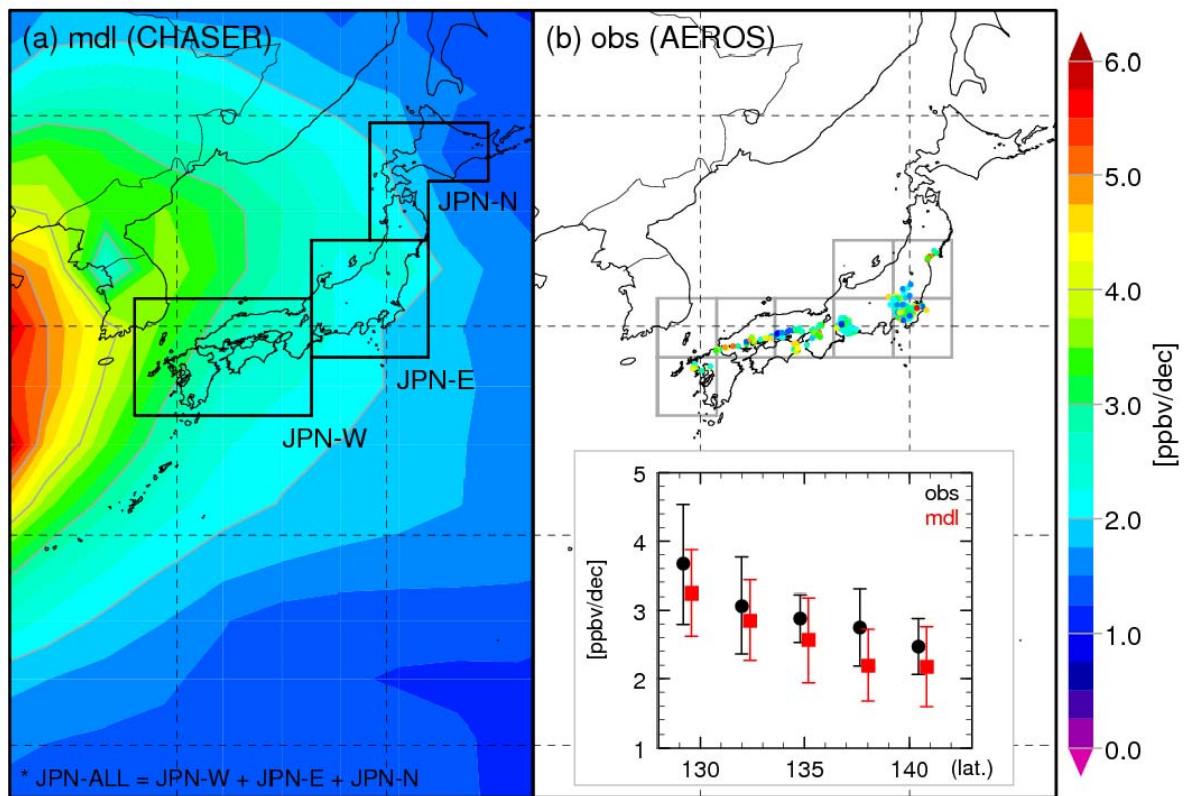

884

885 **Figure 4.** The linear trend of annual mean surface O<sub>3</sub> in 1980–2005 calculated from (a) model  
 886 simulations and (b) observations at AEROS monitoring sites. The inset in figure (b) shows the  
 887 longitudinal change of linear trends (black: AEROS observation; red: model) averaged within  
 888 the model grids shown by gray rectangles. The error bars denote their 95 % confidence  
 889 intervals. The black-rimmed areas in figure (a) are the area for averaging used in the figures  
 890 from Fig. 6. Note that JPN-ALL is the sum of JPN-W, JPN-E, and JPN-N areas and used for  
 891 the averaging in those figures.

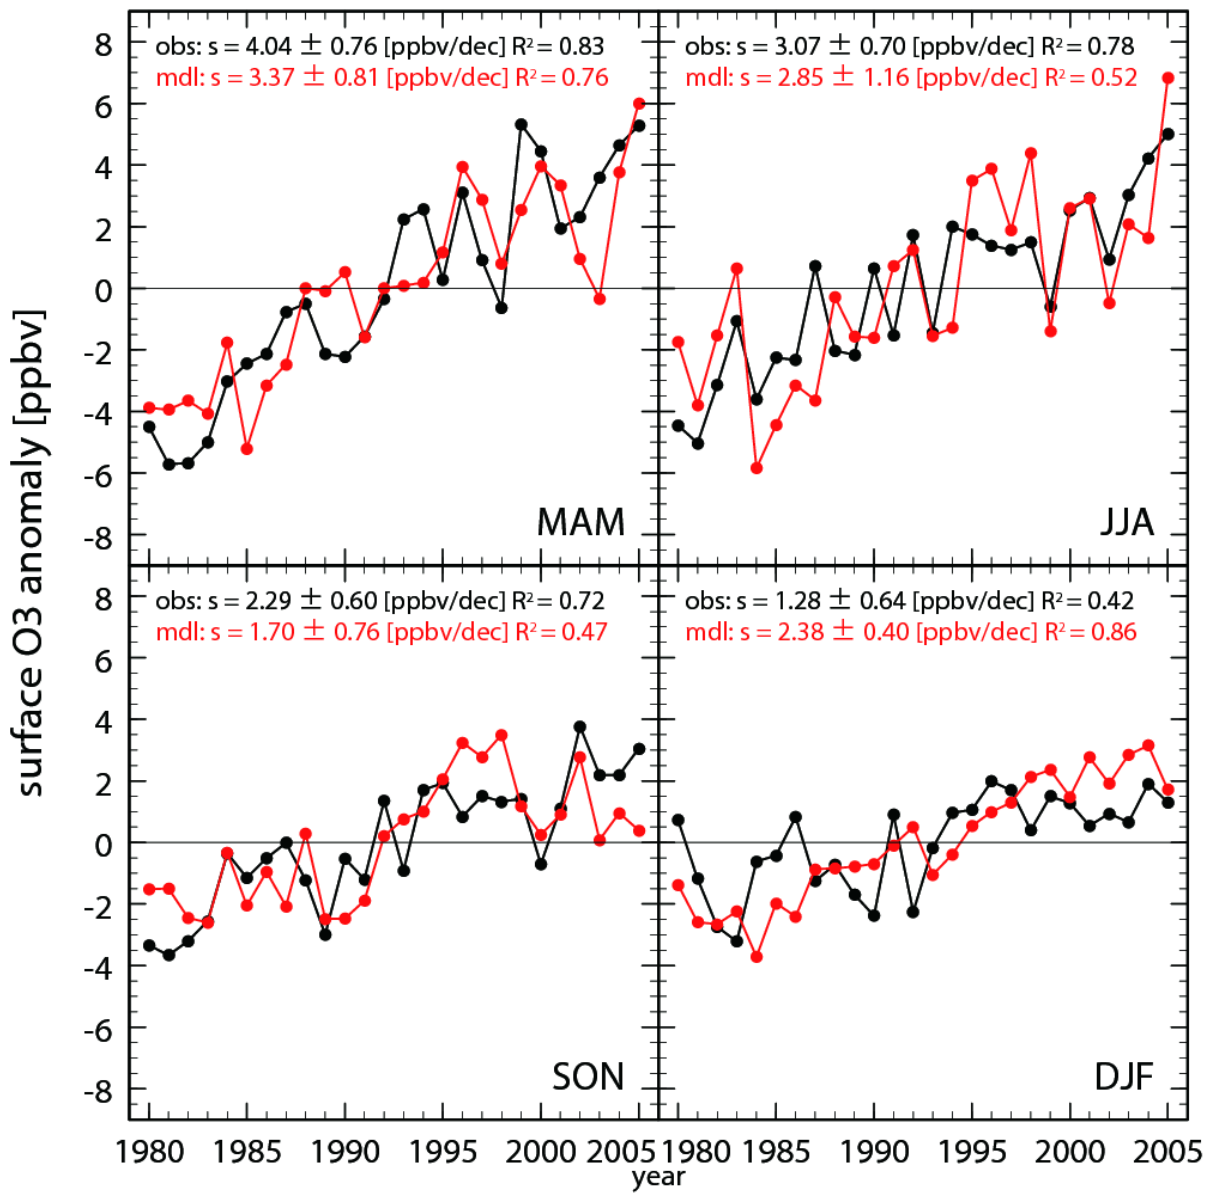

892

893 **Figure 5.** Same as Fig. 3 but the temporal changes of seasonal mean surface O<sub>3</sub> anomaly

894 averaged over Japan from observations (AEROS: black) and model calculations (red).



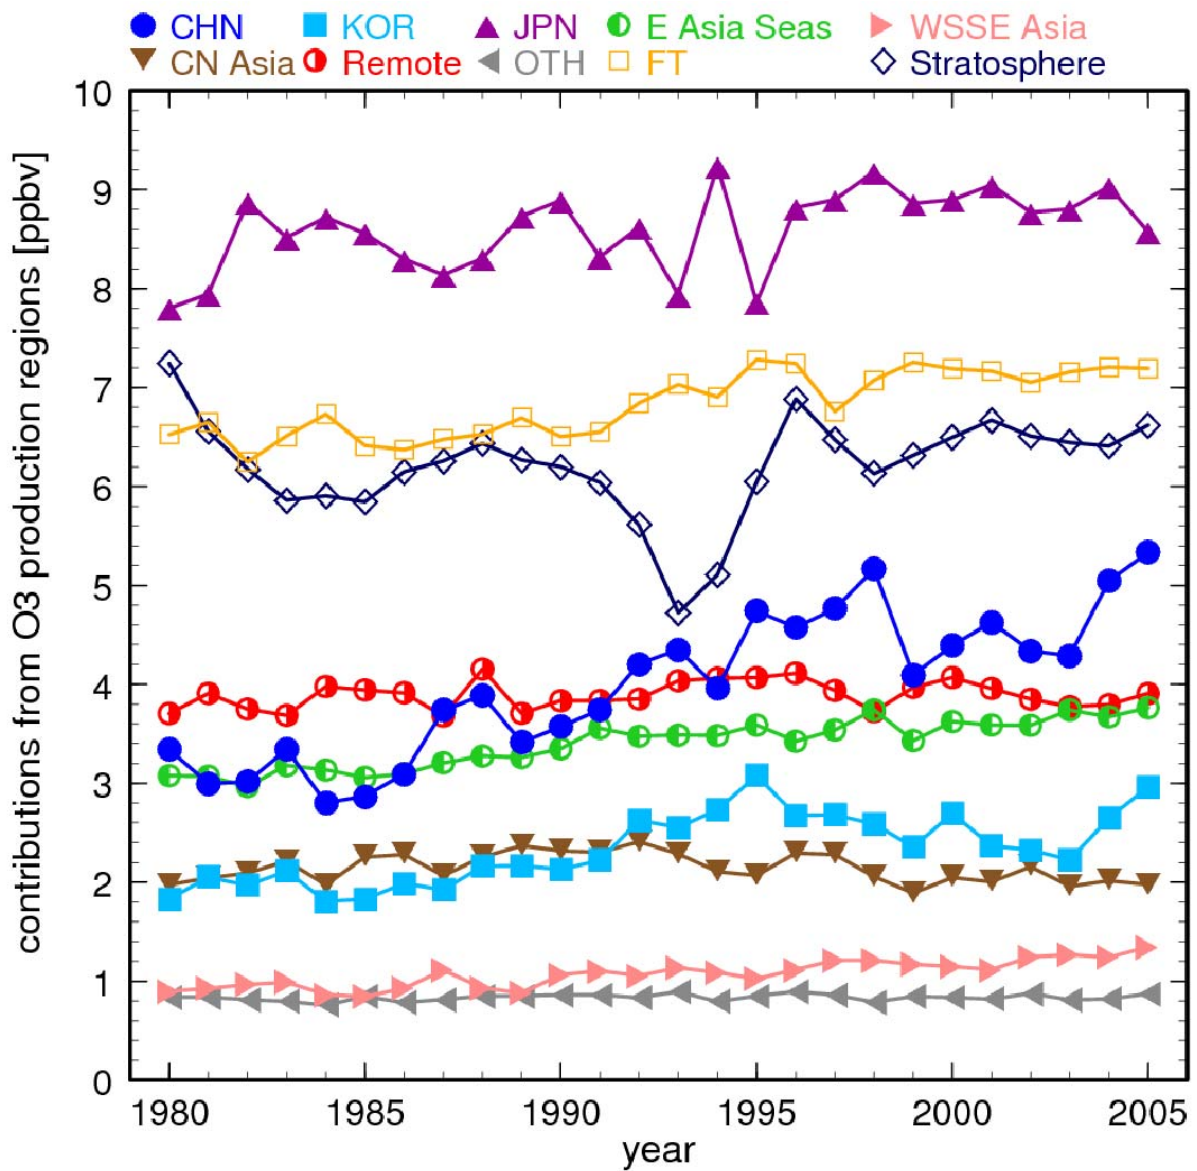

895  
 896 **Figure 6.** Long-term changes of annual mean contributions from source regions to surface O<sub>3</sub>  
 897 over Japan. Some source regions are grouped: E-Asia-Seas is the sum of NPC, JPS, and ECS;  
 898 WSSE Asia is the sum of MES, IND, IDN, and IDC; CN Asia is the sum of CAS and ESB;  
 899 Remote is the sum of AMN, NAT, and EUR; and OTH is the other regions in the planetary  
 900 boundary layer.



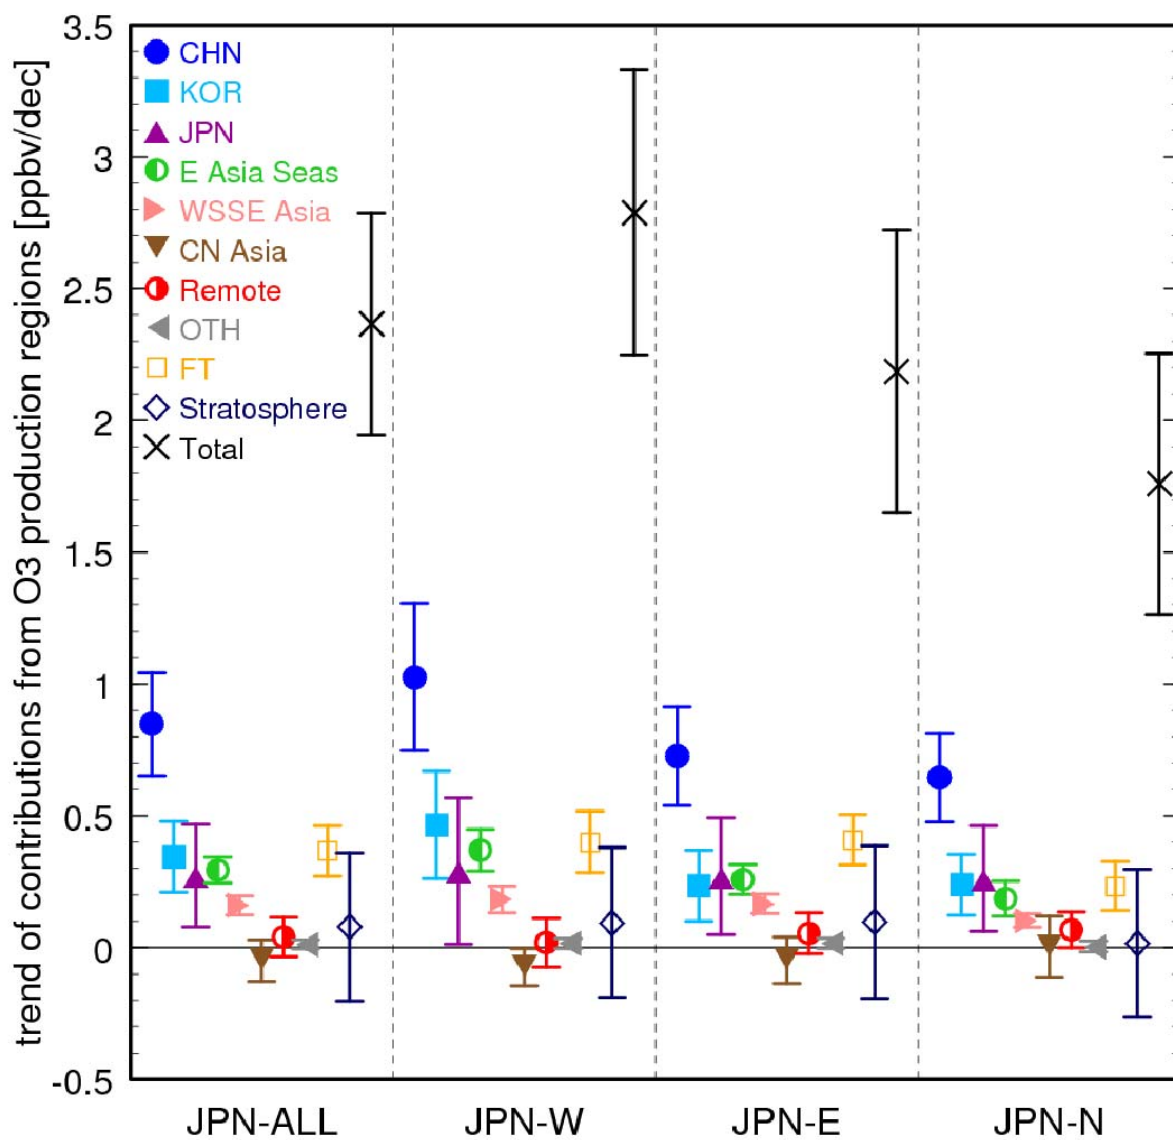

901  
 902 **Figure 7.** Linear trends of annual mean contributions in 1980–2005 from source regions to  
 903 surface O<sub>3</sub> over Japan shown in Fig. 6 (JPN-ALL) and those averaged in three sub-regions in  
 904 Japan (JPN-W, JPN-E, and JPN-N). Error bars are 95 % confidence intervals.

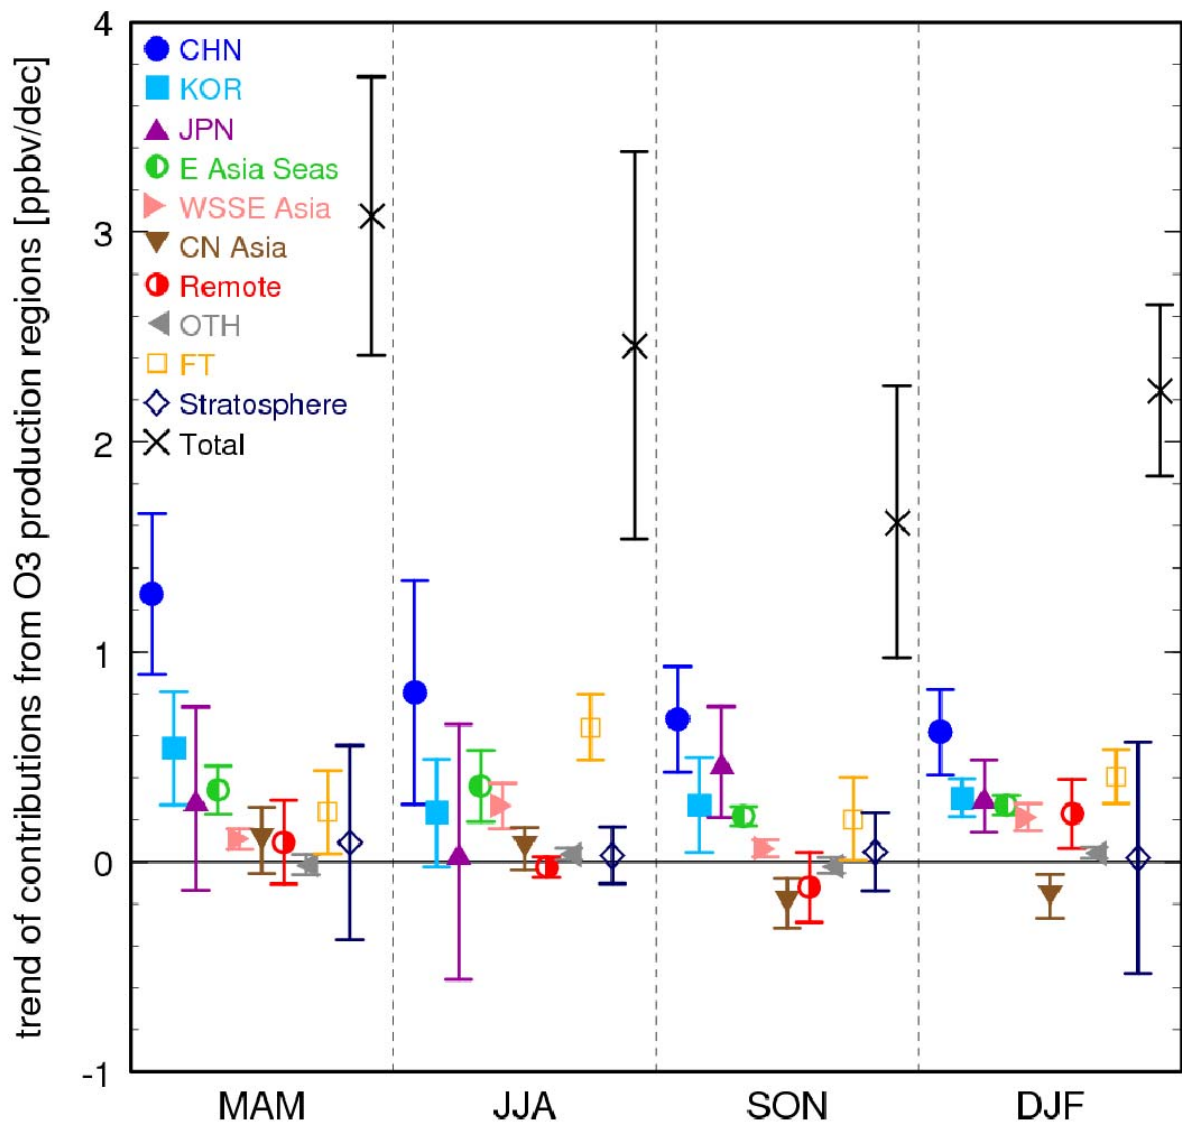

905

906 **Figure 8.** Linear trends of the contributions in 1980–2005 from source regions to surface O<sub>3</sub>  
 907 over Japan in different seasons: spring (MAM), summer (JJA), fall (SON), and winter (DJF).  
 908 Error bars are 95 % confidence intervals.

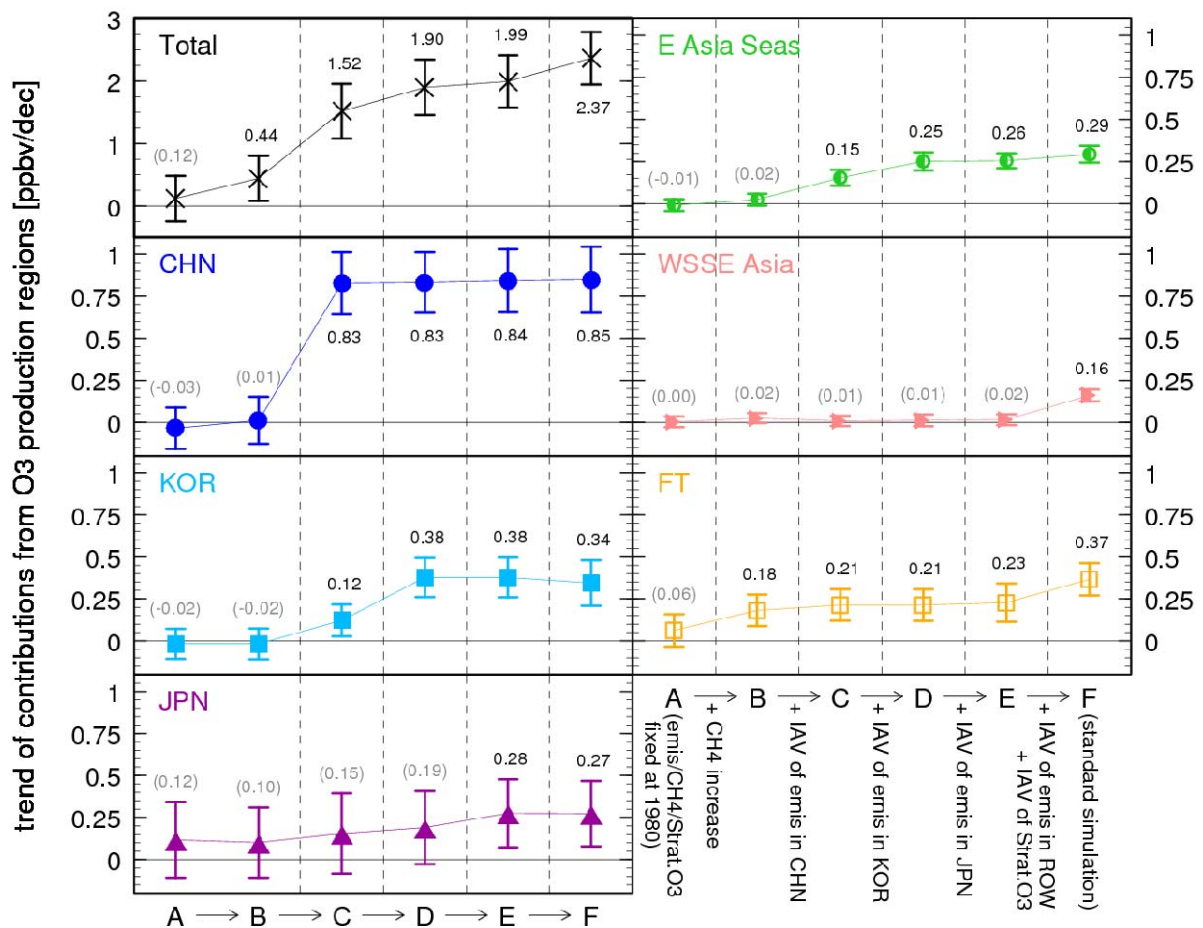

909

910 **Figure 9.** Linear trends of the annual mean contributions in 1980–2005 from source regions  
 911 to surface O<sub>3</sub> over Japan in the sensitivity simulations and the standard simulation (error bars  
 912 are 95 % confidence intervals). The exact values of the trends are also shown in the figure; the  
 913 trends without sufficient statistical significance are shown in parentheses. The trends of each  
 914 region’s contribution in the simulations A–E and F (the standard simulation) are arranged  
 915 from left to right in each panel.
